16 **Genome-wide association studies (GWAS) have identified hundreds of genetic variants**  
17 **associated with dyslipidemia. However, about 95% of of these variants are located in genome**  
18 **noncoding regions and cluster in different loci. The disease-causing variant for each locus and**  
19 **underline mechanism remain largely unknown. We systematically analyzed these noncoding**  
20 **variants and found that rs1997243 is the disease-causing variant in locus 7p22, which is**  
21 **strongly associated with hypercholesterolemia. The rs1997243 risk allele is associated with**  
22 **increased expression of *GPR146* in human and targeted activation of the rs1997243 site**  
23 **specifically up regulates *GPR146* expression in cultured cells. GPR146 is an orphan G-protein**  
24 **coupled receptor that is located on plasma membrane and responses to stimulation of heat-**  
25 **inactivated serum. Disrupting *gpr146* specifically in the liver decreases the blood cholesterol**  
26 **level and prevents high-fat or high-fat high-cholesterol diets induced hypercholesterolemia in**  
27 **mice. Thus we uncovered a novel G-protein coupled receptor that regulates blood cholesterol**  
28 **level in both human and mouse. Our results also suggest that antagonizing GPR146 function**  
29 **will be an effective strategy to treat hypercholesterolemia.**

30 Genome-wide association study (GWAS) is a powerful tool to ascertain the contribution of  
31 common genetic variants in population-wide diseases variability. Hundreds of GWAS studies have  
32 been applied to a variety of diseases or traits including dyslipidemia, diabetes, and hypertension et  
33 al<sup>1</sup>. More than 93% of these disease- and trait-associated variants are located in the non-coding  
34 regions, makes it difficult to evaluate their function<sup>2</sup>. Previous studies showed that these disease-  
35 and trait-associated variants are concentrated in regulatory DNA, with about 80% of all noncoding  
36 GWAS single nucleotide polymorphisms (SNPs) or linkage disequilibrium (LD) SNPs are located  
37 within DNase I hypersensitive sites (DHS)<sup>2</sup>, which suggest that most of these noncoding SNPs

38 function through transcriptional regulation.

39 Hypercholesterolemia is the leading risk factor for cardiovascular diseases. Current evidence  
40 suggests that the heritability for blood cholesterol level is high, with 40-50% for low-density  
41 lipoprotein cholesterol (LDL-C) and 40-60% for high-density lipoprotein cholesterol (HDL-C)<sup>3,4</sup>.  
42 GWAS has been performed extensively on blood lipids traits and more than 300 risk loci were found  
43 in different populations<sup>5</sup>. These loci cover almost all the well-known genes that are important in  
44 lipid metabolism, such as *LDLR*<sup>6</sup>, *ARH*<sup>7</sup>, *ABCA1*<sup>8</sup>, *ABCG5/G8*<sup>9</sup>, *PCSK9*<sup>10</sup>, *NPC1L1*<sup>11,12</sup>, *LIM1*<sup>13</sup>,  
45 et al. Although GWAS is a powerful approach, we find that about 2/3 of these risk loci are located  
46 in noncoding regions and are not close to any gene known plays a role in lipid metabolism. The  
47 disease-causing variants in these loci and their underlying molecular mechanism remain largely  
48 unknown, which prevent the interpretation of the GWAS results and their application in precise  
49 medicine. On the other hand, these noncoding regions may harbor novel genes or signaling  
50 pathways involved in lipid metabolism and provides a valuable resource for further mechanistic  
51 studies.

52 We systematically analyzed these noncoding loci and primarily focused on loci that are not  
53 close to any gene known plays a role in lipid metabolism. One such locus 7p22 is strongly associated  
54 with increased level of blood cholesterol in multi cohorts<sup>14-16</sup> (Fig S1a, S2b). The lead SNP  
55 rs1997243 is a common variant and has the highest frequency in European population but is absent  
56 in East Asian (Fig S1b). It is located in the noncoding region and has a strong linkage disequilibrium  
57 non-synonymous variant rs11761941 (*GPR146* p. Gly11Glu) in some populations (Fig S1a, S2a,  
58 S2b). Both rs1997243 and rs11761941 are significantly associated with blood cholesterol level (Fig  
59 S2b)<sup>15</sup>. However, the *GPR146* p. Gly11 is not conserved and has been substituted with Asp, Asn or

60 Ala in many other species except *Gray wolf* (Fig S2c). Bioinformatics analysis also predicts that  
61 *GPR146* p. Gly11Glu is benign and neutral (Fig S2d), rendering rs11761941 less likely to be the  
62 disease-causing variant.

63 We reasoned that any SNPs that have strong linkage disequilibrium with the lead SNP could be  
64 the real disease-causing variant. Since all these variants are located in the noncoding region, the real  
65 disease-causing variant is most likely located in the regulatory region, such as regions marked by  
66 DNase I hypersensitivity and/or histone modifications marker H3K27ac and H3K4me3<sup>17-21</sup>. We  
67 systematically analyzed all SNPs that have strong linkage disequilibrium with the lead SNP  
68 rs1997243 in 7p22 locus. There are 125 SNPs were identified, with 28 of them are located in genome  
69 active regions (Fig S3a, S3i, Table S1). We then applied luciferase reporter assay to compare the  
70 transcriptional activities between the minor allele and the major allele for each of these SNPs.  
71 Promoter sequence of *APOA1* was used as a positive control for the assay (Fig S3b). We found that  
72 across all SNPs tested, only rs1997243 shows increased promoter activity compared with its  
73 reference allele under similar transfection efficiency (Fig 1b, Fig S3c-k). The rs1997243 does not  
74 change enhancer activity in enhancer luciferase reporter assay (Fig 1c, Fig S3l), which is consistent  
75 with enriched promoter specific histone marker H3K4me3 at this position (Fig 1a)<sup>17,20,21</sup>.

76 Expression quantitative trait loci (eQTL) analysis showed that the rs1997243 minor allele (G-  
77 allele) is strongly associated with increased expression of *GPR146* in human (Fig 1d). Targeted  
78 activation of rs1997243 site with enzymatic dead Cas9 (dCas9) system and a gRNA specifically to  
79 the rs1997243 position increases the expression level of *GPR146* significantly, with no detectable  
80 impact on other genes in this region (Fig 1e, Fig S2e). These data suggest that the rs1997243 is the  
81 disease-causing variant and may increase blood cholesterol level through up regulating *GPR146*

82 expression.

83 GPR146 is an orphan G-protein coupled receptor that is highly expressed in liver and adipose  
84 tissue of both human and mouse (Fig S4a, Fig 2a). In the liver, it specifically expresses in  
85 hepatocytes (Fig 2b). By prediction, it contains typical seven transmembrane domains with N  
86 terminal facing extracellular compartment (Fig S4b, c). When expressed in cells, GPR146 is located  
87 in membrane fraction and is located on plasma membrane, which suggests that it may function as a  
88 receptor (Fig 2c, d). GPCRs typically signaling through  $G\alpha_s$ ,  $G\alpha_{i/o}$ ,  $G\alpha_{q/11}$ ,  $G\alpha_{12/13}$  or  $G\beta/\gamma$  and  
89 regulate cAMP production, intracellular  $Ca^{2+}$  mobilizations, ERK/MAPK activity or small G protein  
90 RhoA activity et al<sup>22</sup>. We found that GPR146 responses to serum filtered by 3 kDa cut-off filter and  
91 activates the transcriptional activity of cAMP response element (CRE) (Fig 2e). Moreover, this  
92 response is preserved when the serum was further heat-inactivated by boiling and can be fully  
93 blocked by PKA inhibitor H-89 (Fig 2f). Taken together, our data suggests that GPR146 is a cell  
94 signaling receptor that responses to serum stimulation and activates the PKA signaling pathway.

95 To further study its function *in vivo*, we generated *gpr146* knockout mouse model with *Cre-*  
96 *LoxP* system (Fig S5a). Totally we got 6 lines of *LoxP* positive F1 mice and they were genotyped  
97 by genome sequencing (data not shown), southern blot analysis (Fig S5b) and PCR genotyping (Fig  
98 S5c). Line 92 was used for all experiments except otherwise indicated. We generated whole body,  
99 liver specific and adipose tissue specific *gpr146* knockout mice by crossing the *LoxP/LoxP* mice  
100 with Cre recombinase driven by *CMV*, *albumin* and *adiponectin* promoters respectively. Whole  
101 body *gpr146*<sup>-/-</sup> mice have significantly decreased blood cholesterol level compared with their  
102 littermate controls (Fig S6a, b). In contrast, the adipose tissue specific *gpr146*<sup>-/-</sup> mice have no  
103 detectable difference of blood lipids levels compared with their littermate controls (Fig S6c, d). The

104 liver specific *gpr146*<sup>-/-</sup> (Li-*gpr146*<sup>-/-</sup>) mice have significantly decreased blood cholesterol level as  
105 the whole body *gpr146*<sup>-/-</sup> mice and are protected from high-fat high-cholesterol diet induced  
106 hypercholesterolemia (Fig 3a-d), which suggest that *gpr146* regulates blood cholesterol level mainly  
107 through the liver. Consistent with decreased plasma cholesterol level, both ApoB-100 and ApoB-48  
108 protein levels are significantly decreased in the plasma, especially under high-fat high-cholesterol  
109 diet feeding (Fig 3e, f). ApoA1 is also slightly decreased in Li-*gpr146*<sup>-/-</sup> mice under high-fat high-  
110 cholesterol diet feeding (Fig 3e, f). Moreover, Li-*gpr146*<sup>-/-</sup> mice are protected from high-fat diet  
111 induced hypercholesterolemia (Fig 4a). To test whether acutely suppressing *gpr146* will decrease  
112 blood cholesterol level, we knocked down *gpr146* in livers of adult mice through adeno-associated  
113 virus mediated shRNA delivering. As shown in Figure 4b, knocking down *gpr146* in the liver  
114 significantly decreases the blood cholesterol level, which indicates that blocking *gpr146* function  
115 will be an effective strategy to decrease blood cholesterol in adults. These results were confirmed  
116 in Li-*gpr146*<sup>-/-</sup> mice derived from an independent F1 line (Fig 4c, d, Fig S5b). Taken together, our  
117 results clearly demonstrate that GPR146 positively regulates blood cholesterol level, which is  
118 consistent with increased blood cholesterol level in humans with rs1997243 minor allele.

119 In summary, through bioinformatics analysis and experimental verification we found a  
120 noncoding disease-causing variant rs1997243 in locus 7p22. The risk allele of rs1997243 up  
121 regulates an orphan G-protein coupled receptor *GPR146* that plays an important role in regulating  
122 blood cholesterol level. We believe that the increased expression level of *GPR146* can at least  
123 partially explain the disease-causing effect of rs1997243 in human.

124 In contrast to the causal variants in Mendelian disease, which typically confer large effect, the  
125 common variants from GWAS usually have modest effects for each of them. This is especially true

126 for GWAS SNPs that are located in genome noncoding regions. However, variants that explain a  
127 small proportion of the traits may provide substantial biological or therapeutic insights. The  
128 rs1997243 confers a modest effect on total blood cholesterol level with effect size of 0.033<sup>14</sup>.  
129 However, combining bioinformatics analysis and functional studies we found that the downstream  
130 target gene *GPR146* has a large impact on blood cholesterol level. Our data also reveal that GPR146  
131 responses to an endogenous ligand in the serum and activates the PKA signaling pathway, which  
132 suggest that GPR146 is a functional GPCR and has therapeutic potential. Thus our study provides  
133 an example that the common noncoding variant with modest effect may provide important  
134 biological or therapeutics insights. The strategy we developed here can be applied to other  
135 noncoding loci with unknown mechanisms as well.

136 Our study should be interpreted within the context of its limitations. First, we systematically  
137 analyzed all SNPs in 200 Kb window across the locus and found that rs1997243 is the only variant  
138 that changes promoter activity of the genome sequence and increases the expression level of  
139 *GPR146*. We cannot exclude the possibility that there exist other variants that extremely far away  
140 from the lead SNP and mediate the disease-causing effect together with rs1997243. However, our  
141 study provides compelling evidences that rs1997243 is the disease-causing variant and increases  
142 *GPR146* expression level, which at least contributes to the increased blood cholesterol level in  
143 human. Second, our animal models strongly suggest that Gpr146 regulates blood cholesterol level  
144 mainly through the liver. However, eQTL analysis showed that the strongest association for *GPR146*  
145 expression level and the rs1997243 risk allele is in human whole blood cells. Thus we cannot  
146 exclude the possibility that GPR146 may regulate blood cholesterol level through other tissues  
147 together with liver in human. Third, we found that *gpr146* knockout mice have decreased blood

148 cholesterol level, however the underline mechanism needs further investigation. Our preliminary  
149 data (not shown) indicate that the *gpr146* knockout mice have normal food intake and fecal  
150 cholesterol excretion rate, which suggest that the decreased blood cholesterol could be caused by  
151 decreased cholesterol secretion into circulation or increased cholesterol clearance from the  
152 circulation.

153 During preparation of this manuscript, Dr. Cowan's group reported the phenotypic  
154 characterization of *gpr146* knockout mice<sup>23</sup>. They reported that *gpr146* knockout mice have  
155 decreased level of blood cholesterol, which is consistent with our results. However, our results  
156 provide genetic evidence that GPR146 regulates blood cholesterol level not only in mice but also in  
157 human. First, although the 7p22 locus is strongly associated with hypercholesterolemia, we are the  
158 first to show that the rs1997243 is the disease-causing variant in this locus. Second, we provide  
159 multiple evidences that the rs1997243 risk allele specifically up regulates the expression level of  
160 *GPR146* in this locus. Third, by generating the *gpr146* knockout mouse models, we provide strong  
161 evidences that Gpr146 positively regulates blood cholesterol level mainly through the liver.  
162 Altogether, our results indicate that GPR146 is an important regulator of blood cholesterol level in  
163 both human and mouse. Together with the decreased atherosclerosis in *gpr146* knockout mice in Dr.  
164 Cowan's report<sup>23</sup>, we believe GPR146 will be an attractive drug target for hypercholesterolemia and  
165 atherosclerotic cardiovascular diseases.



166 **Methods**

167 **Mice**

168 Mice were housed in the temperature-controlled specific pathogen-free animal facility on a 12 h  
169 light-dark daily cycle with free access to water and normal chow diet. All animal care and  
170 experimental procedures were approved by the Institutional Animal Use and Care Committee of  
171 College of Life Sciences, Wuhan University. *Gpr146 LoxP* mice were generated with CRISPR/Cas9  
172 technology on C57BL/6J background by Nanjing Biomedical Research Institute of Nanjing  
173 University. Two gRNA spanning the *gpr146* genome locus are used: 5'-  
174 CCAGCAATGCTGGGAGACGT-3' and 5'-GGCTCCGGGCTCATGTGGGA-3'. Donor vector  
175 containing the *gpr146* genome sequence and *LoxP* sites are co-injected with Cas9/gRNA complex  
176 (Fig S5a). F0 mice were crossed with wild-type C57BL/6J mice and F1 mice were further genotyped  
177 by DNA sequencing, southern blot and PCR analysis. *CMV-Cre* (The Jackson Laboratory: 006054),  
178 *Albumin-Cre* (The Jackson Laboratory: 003574) and *Adiponectin-Cre* (The Jackson Laboratory:  
179 010803, gift from Dr. Shengzhong Duan, Shanghai Jiao Tong University) mice were used to  
180 generate whole body, liver specific and adipose tissue specific *gpr146* knockout mice respectively.  
181 High-fat diet (60%, catalog: D12492) and high-fat high-cholesterol diet (40% Cal and 1.25%  
182 cholesterol, catalog: D12108C) were obtained from Research diets.

183 **Cell Culture and Reagents**

184 293T cells, HEK293 cells and HepG2 cells were purchased from China Center for Type Culture  
185 Collection (CCTCC) and cultured in high glucose DMEM with 10% FBS and 100 units/mL  
186 penicillin G/streptomycin (Gibco, 15140-122). Cells were incubated at 37°C with 5% CO<sub>2</sub>. Cell  
187 culture medium was obtained from Life Technologies (12800-082), FBS was obtained from Pan

188 Seratech (ST30-3302). EDTA-free protein inhibitor cocktail was purchased from Bimake (B14001).

189 Polyethylenimine (PEI) was obtained from Polysciences (catalog: 24765, Warrington, PA).

190 Lentivirus was produced in 293T cells by co-transfecting the packaging plasmids pVSVg  
191 (AddGene, 8454) and psPAX2 (AddGene, 12260) with Cas9 (Addgene, 52962) or gRNA (Addgene,  
192 52963) expressing plasmids using PEI according to the instruction. 48 hours after transfection,  
193 condition medium was harvest for further experiment.

#### 194 **CRISPR/dCas9 mediated genome activation**

195 CRISPR/dCas9 mediated genome activation was performed as described<sup>24</sup> with following  
196 modification. The dCas9-GCN4-scFc-p65-HSF1 coding motifs (gift from Dr. Hui Yang, Institute of  
197 Neuroscience, Chinese Academy of Sciences) were splitted and expressed separately in pLVX-  
198 IRES-Puro vector (Clontech, 632183). pLVX-dCas9-GCN4, PLVX-scFv-p65-HSF1 are packed into  
199 lentivirus separately and co-infected with lentivirus expressing gRNA targeting the rs1997243 site  
200 in HepG2 cells. 48 hours after infection, cells were collected and RNA was extracted for gene  
201 expression analysis.

#### 202 **Luciferase reporter assay**

203 For promoter activity assay, about 2 kb genome sequence covering indicated SNPs were amplified  
204 from HepG2 genome using primers listed in Table S2. The DNA fragments were cloned into  
205 upstream of *firefly* luciferase through *XhoI* and *KpnI* in pGL3-basic vector (Promega, E1751). For  
206 enhancer activity assay, a TATA mini promoter was first cloned into upstream of *firefly* luciferase  
207 and then DNA fragments were cloned into upstream of TATA box through *XhoI* and *KpnI* in pGL3-  
208 mini promoter vector. Corresponding minor alleles for each SNPs were introduced by recombination  
209 with primers listed in Table S2. The *firefly* luciferase reporter plasmids and *renilla* luciferase control

210 plasmid (Promega, E2241) were co-transfected into HepG2 cells with Lipoplus (Sagecreation,  
211 Q03003) according to the instruction. 24 hours after transfection, luciferase activity was determined  
212 using Dual-luciferase reporter assay system (Promega, E1960). *Firefly* luciferase activity was  
213 normalized with *renilla* luciferase activity and the vector transfected group was set to one.  
214 Transfection efficiency for each reporters were measured by real-time PCR using DNA extracted  
215 from cells in parallel experiments. Specific primers recognizing *firefly* luciferase and *renilla*  
216 luciferase are listed in Table S2.

217 The CRE-luciferase reporter was generated by putting the cAMP regulatory elements (CRE)  
218 in front of *firefly* luciferase in pGL4 basic vector (Promega, E134A). *hRenilla* luciferase (Promega,  
219 E692A) was used as internal control. To increase plasma membrane localization of GPR146, a 39  
220 amino acids of bovine rhodopsin was fused to the N terminal of GPR146 as described previously<sup>25</sup>.  
221 GPR146 expressing plasmid or vector control plasmid was co-transfected with luciferase reporter  
222 plasmids by transient transfection using PEI. Eight hours later, cells were changed with serum free  
223 medium containing 0.1% fatty acid free BSA (Sangon Biotech, A602448). About 16 hours later,  
224 cells were treated with or without indicated amount of fetal bovine serum (FBS) for 6 hours.  
225 Luciferase activity was assayed with Dual-luciferase reporter assay system (Promega, E1960).  
226 Filtered FBS was made by passing through a 3 kD cut-off filter with centrifugation (Millipore,  
227 UFC9003). Heat-inactivated FBS was made by boiling the 3 kD filtered FBS at 95°C for 10 minutes.  
228 Then the serum was span down and the supernatant was collected for experiments. In some  
229 experiments, cells were pre-incubated with 10  $\mu$ M of PKA inhibitor H-89 (Selleck, S1582) for 60  
230 minutes before FBS treatment.

231 **ENCODE analysis**

232 DNase I hypersensitive signal integrates display of DNase I hypersensitivity in multi cell lines by  
233 UCSC. DNase I Seq and H3K27ac, H3K4me3 histone modification Chip-seq were performed on  
234 human liver samples and the data was downloaded from ENCODE project data portal.

235 Links for these 4 datasets are:

236 DNase I hypersensitive signal:

237 <http://genome.ucsc.edu/cgi-bin/hgTrackUi?db=hg38&g=wgEncodeRegDnase>

238 DNase I Seq: <https://www.encodeproject.org/experiments/ENCSR158YXM/>

239 H3K27ac Chip-seq: <https://www.encodeproject.org/experiments/ENCSR981UJA/>

240 H3K4me3 Chip-seq: <https://www.encodeproject.org/experiments/ENCSR344TLI/>

#### 241 **Linkage disequilibrium analysis**

242 Linkage disequilibrium ( $r^2$ ) was calculated with Ensemble LD calculator using European population  
243 from 1000 genome phase 3. The window size was set to 200 kb around rs1997243.  $r^2 > 0.8$  was  
244 considered as positive.

#### 245 **eQTL analysis**

246 The eQTL data in whole blood cells was obtained from gTex and the eQTL figure was generated  
247 using gTex webtool.

#### 248 **Transmembrane domain and variant impact prediction**

249 GPR146 Transmembrane domain was predicted by TMHMM server V.2.0 at

250 <http://www.cbs.dtu.dk/services/TMHMM/>

251 *GPR146* p. Gly11Glu impact prediction was performed with two different software.

252 PolyPhen-2: <http://genetics.bwh.harvard.edu/pph2/>

253 PROVEAN: <http://provean.jcvi.org/index.php>

254 **Blood chemistry and lipoprotein profiling**

255 Plasma total cholesterol and triglyceride levels were measured by enzymatic kits (Shanghai Kehua  
256 Bio-Engineering Co). Plasma lipoprotein particles were size fractionated by Fast Protein Liquid  
257 Chromatography (FPLC) using a Superose 6 column (GE Healthcare) and the cholesterol content  
258 in each fraction was measured accordingly<sup>26</sup>.

259 **Immunoblot analysis**

260 Biotinylation and immunoblot was performed as described previously<sup>27</sup> except that the cells and  
261 liver tissue were lysated in RIPA buffer (50 mM Tris-HCl, pH=8.0, 150 mM NaCl, 0.1% SDS, 1.5%  
262 NP40, 0.5% deoxycholate, 2 mM MgCl<sub>2</sub>). For cell fractionation experiments, cells were  
263 homogenized by passing through #7 needle for 60 times on ice. Nuclear pellet was isolated by low  
264 speed centrifugation (750 g) for 20 minutes at 4°C. The supernatant was transferred for high speed  
265 (100,000 g) centrifugation for 60 minutes at 4°C. Then the supernatant was saved as cytosol fraction  
266 and the membrane pellet was re-suspended in SDS lysis buffer (10mM Tris-HCl, pH 6.8, 100mM  
267 NaCl, 1% SDS, 1mM EDTA, 1 mM EGTA) and incubated at 37 degree for 30 minutes. Then  
268 membrane suspension was span down again at 12,000 g for 5 minutes at room temperature and was  
269 saved as membrane fraction. The nuclear pellet was re-suspended in nuclear lysate buffer (20mM  
270 HEPES/KOH, pH7.6, 2.5% (v/v) glycerol, 1.5mM MgCl<sub>2</sub>, 0.42M NaCl, 1mM EDTA, 1mM EGTA)  
271 and rotates at 4 degree for 1 hour. Then the suspension was span down at 14,000 g for 20 minutes  
272 at 4°C and the supernatant was saved as nuclear fraction. Cytosol, membrane and nuclear fractions  
273 were added with sample buffer and incubated at 37 degree for 30 minutes and then subjected to  
274 immunoblot analysis. To detect apolipoproteins, the fresh blood was collected into EDTA coated  
275 tubules containing aprotinin (Sigma, A1153-25MG). Then plasma was isolated at 4 degree and was

276 subjected to immunoblots analysis.

277 The following antibodies were used in this study: anti-Flag antibody (Medical & Biological  
278 Laboratories, PM020); anti-calnexin antibody (Proteintech, 10427-2-AP); anti-Actin antibody  
279 (Proteintech, 20536-1-AP), anti-Lamin B1 antibody (Proteintech, 20536-1-AP), anti-GPR146  
280 antibody (CUSABIO,CSB-PA006863), anti-ATP1A1 antibody (Abclonal, A0643), anti-ApoB  
281 antibody<sup>26</sup> and anti-ApoA1 antibody (Proteintech, 14427-1-AP).

### 282 **Real-Time PCR analysis**

283 Total RNA was extracted from cells or mouse tissues using TRI Reagent (Sigma-Aldrich, T9424).  
284 The quality and concentration of RNA were measured with NanoDrop ONE<sup>c</sup> (Thermo Scientific).  
285 cDNA was synthesized from 2 µg of total RNA using a cDNA Reverse Transcription Kit (Thermo  
286 Scientific, M1682). The cDNA was quantified by Real-Time PCR using SYBR Green master mix  
287 (YEASEN Biotech Co, 11201ES08). Reactions were running in technical duplicate on CFX96 or  
288 CFX384 wells plates. Relative quantification was completed using the  $\Delta\Delta$ CT method. Gene  
289 expression was normalized to housekeeping gene Gapdh, 36B4 or Cyclophilin.

### 290 **Primary hepatocytes and non-hepatocytes**

291 Mouse liver was first ligated and a piece of liver was sliced and frozen in liquid N<sub>2</sub> as whole liver  
292 sample. The left over liver was perfused with wash buffer followed by collagenases 1 digestion  
293 buffer exactly the same as described<sup>27</sup>. Then the liver was transferred to a 60 mm dish in cold  
294 digestion buffer and the particulate material was filtered through a 70 µm filter. The pass through  
295 was span down at 40 g\*10 minutes for three times at 4°C. The pellets from each spin were pooled  
296 together and are the primary hepatocytes. The supernatant was span down again at 500 g for 10  
297 minutes. The pellet was collected as non-hepatocytes. Total RNA was extracted and 2 µg of RNA

298 was subjected to reverse transcription as described above followed by real-time PCR analysis.

### 299 **Adeno-associated virus packaging and purification**

300 Adeno-associated virus was produced in 293T cells by co-transfecting the shRNA expression AAV  
301 shuttle plasmid together with Delta F6 helper plasmid, Rev Cap 2/9 plasmids using PEI. 60 hours  
302 after transfection, cells were harvested and freeze-thaw in lipid nitrogen for five times. Then  
303 Benzonase Nuclease (Sigma, E1014) was added and incubated at 37 degree for 45 minutes. After  
304 centrifugation at 4000 rpm for 30 minutes, the supernatant was collected and added on top of the  
305 iodixanol gradient (15%, 25%, 40%, 58%). Then the sample was centrifuged at 48000 rpm in a  
306 Beckman type 70Ti rotor for 130 minutes at 18 degree. The fraction in the 40% iodixanol was  
307 collected and dialyzed with  $1 \times$  PBS extensively. The titer of the virus was determined by qRT-PCR.  
308 To knock down *gpr146* in the liver, each mouse was infused with  $1 \times 10^{11}$  virus particles through tail  
309 vein and samples were collected at one and two weeks after injection. The shRNA sequence against  
310 *gpr146* was listed in Table S2.

### 311 **Data analysis**

312 All data are expressed as mean  $\pm$  SEM and p values were calculated using Student's test in GraphPad  
313 unless otherwise indicated.

### 314 **Abbreviations**

315 GWAS: Genome-wide association study; SNPs: Single nucleotide polymorphisms; DHS: DNase I  
316 hypersensitive signal; eQTL: Expression quantitative trait loci; HDL: High-density lipoprotein;  
317 LDL: Low-density lipoprotein; CRISPR/Cas9: Clustered regularly interspaced short palindromic  
318 repeats.

### 319 **Acknowledgements**

320 The authors would like to thank Dr. Hui Yang (Institute of Neuroscience, Chinese Academy of  
321 Sciences) for the dCas9-GCN4-scFc-p65-HSF1 plasmid, the ENCODE Consortium and the  
322 ENCODE production laboratory(s) generating the datasets used in the manuscript. This work was  
323 supported by grants from the National Natural Science Foundation of China (31570807, 31771304,  
324 91754101, 91857000), the National Key Research and Development Program of China  
325 (2016YFA0500100, 2018YFA0800700), the 111 Project of China (B16036), the Fundamental  
326 Research Funds for the Central Universities of China (2042017kf0240, 2042017kf0187), the Key  
327 Research and Development Program of Hubei province (2019CFA067) and state key laboratory of  
328 Natural Medicines (SKLNMKF201902).

#### 329 **Author contributions**

330 F.F.H, X.L, C.F.C, Y.N.L and Y.W designed the study. F.F.H, X.L, C.F.C, Y.N.L, M.K.D, Y.Y.G,  
331 Y.L.Z, X.D.L developed experimental methods. F.F.H, X.L, C.F.C, Y.N.L, M.K.D, Y.Y.G, Y.L.Z,  
332 X.D.L, X.M.L performed experiments. D.H.W, Y.Z, M.A, Y.L, B.L.S, H.S.H.H, Y.W contributed  
333 to data analysis and interpretation. F.F.H, X.L, C.F.C, Y.N.L and Y.W wrote the manuscript with  
334 input from all authors. Y.W supervised the work and obtained the funding.

#### 335 **Competing interests**

336 We have no conflict of interests to disclose.



337 **Reference**

- 338 1. Hindorff, L.A.e.a. A Catalog of Published Genome-Wide Association Studies. Available at  
339 [www.genome.gov/gwastudies](http://www.genome.gov/gwastudies).
- 340 2. Maurano, M.T. *et al.* Systematic localization of common disease-associated variation in  
341 regulatory DNA. *Science* **337**, 1190-5 (2012).
- 342 3. Kathiresan, S. *et al.* A genome-wide association study for blood lipid phenotypes in the  
343 Framingham Heart Study. *BMC Med Genet* **8 Suppl 1**, S17 (2007).
- 344 4. Weiss, L.A., Pan, L., Abney, M. & Ober, C. The sex-specific genetic architecture of  
345 quantitative traits in humans. *Nat Genet* **38**, 218-22 (2006).
- 346 5. Chen, L. *et al.* Regulation of glucose and lipid metabolism in health and disease. *Sci China*  
347 *Life Sci* **62**, 1420-1458 (2019).
- 348 6. Goldstein, J.L. & Brown, M.S. The LDL receptor. *Arterioscler Thromb Vasc Biol* **29**, 431-  
349 8 (2009).
- 350 7. Garcia, C.K. *et al.* Autosomal recessive hypercholesterolemia caused by mutations in a  
351 putative LDL receptor adaptor protein. *Science* **292**, 1394-8 (2001).
- 352 8. Brooks-Wilson, A. *et al.* Mutations in ABC1 in Tangier disease and familial high-density  
353 lipoprotein deficiency. *Nat Genet* **22**, 336-45 (1999).
- 354 9. Berge, K.E. *et al.* Accumulation of dietary cholesterol in sitosterolemia caused by  
355 mutations in adjacent ABC transporters. *Science* **290**, 1771-5 (2000).
- 356 10. Abifadel, M. *et al.* Mutations in PCSK9 cause autosomal dominant hypercholesterolemia.  
357 *Nat Genet* **34**, 154-6 (2003).
- 358 11. Altmann, S.W. *et al.* Niemann-Pick C1 Like 1 protein is critical for intestinal cholesterol  
359 absorption. *Science* **303**, 1201-4 (2004).
- 360 12. Wang, L.J. *et al.* Molecular characterization of the NPC1L1 variants identified from  
361 cholesterol low absorbers. *J Biol Chem* **286**, 7397-408 (2011).
- 362 13. Zhang, Y.Y. *et al.* A LIMA1 variant promotes low plasma LDL cholesterol and decreases  
363 intestinal cholesterol absorption. *Science* **360**, 1087-1092 (2018).
- 364 14. Willer, C.J. *et al.* Discovery and refinement of loci associated with lipid levels. *Nat Genet*  
365 **45**, 1274-1283 (2013).
- 366 15. Liu, D.J. *et al.* Exome-wide association study of plasma lipids in >300,000 individuals. *Nat*  
367 *Genet* **49**, 1758-1766 (2017).
- 368 16. Klarin, D. *et al.* Genetics of blood lipids among ~300,000 multi-ethnic participants of the

- 369 Million Veteran Program. *Nat Genet* **50**, 1514-1523 (2018).
- 370 17. Consortium, E.P. An integrated encyclopedia of DNA elements in the human genome.  
371 *Nature* **489**, 57-74 (2012).
- 372 18. Gross, D.S. & Garrard, W.T. Nuclease hypersensitive sites in chromatin. *Annu Rev Biochem*  
373 **57**, 159-97 (1988).
- 374 19. Thurman, R.E. *et al.* The accessible chromatin landscape of the human genome. *Nature*  
375 **489**, 75-82 (2012).
- 376 20. Heintzman, N.D. *et al.* Distinct and predictive chromatin signatures of transcriptional  
377 promoters and enhancers in the human genome. *Nat Genet* **39**, 311-8 (2007).
- 378 21. Ernst, J. & Kellis, M. Discovery and characterization of chromatin states for systematic  
379 annotation of the human genome. *Nat Biotechnol* **28**, 817-25 (2010).
- 380 22. Cheng, Z. *et al.* Luciferase Reporter Assay System for Deciphering GPCR Pathways. *Curr*  
381 *Chem Genomics* **4**, 84-91 (2010).
- 382 23. Yu, H. *et al.* GPR146 Deficiency Protects against Hypercholesterolemia and  
383 Atherosclerosis. *Cell* **179**, 1276-1288 e14 (2019).
- 384 24. Zhou, H. *et al.* In vivo simultaneous transcriptional activation of multiple genes in the brain  
385 using CRISPR-dCas9-activator transgenic mice. *Nat Neurosci* **21**, 440-446 (2018).
- 386 25. Chandrashekar, J. *et al.* T2Rs function as bitter taste receptors. *Cell* **100**, 703-11 (2000).
- 387 26. Wang, Y. *et al.* Inactivation of ANGPTL3 reduces hepatic VLDL-triglyceride secretion. *J*  
388 *Lipid Res* **56**, 1296-307 (2015).
- 389 27. Wang, Y., Huang, Y., Hobbs, H.H. & Cohen, J.C. Molecular characterization of proprotein  
390 convertase subtilisin/kexin type 9-mediated degradation of the LDLR. *J Lipid Res* **53**,  
391 1932-43 (2012).
- 392 28. Lu, X. *et al.* Exome chip meta-analysis identifies novel loci and East Asian-specific coding  
393 variants that contribute to lipid levels and coronary artery disease. *Nat Genet* **49**, 1722-  
394 1730 (2017).

Figure 1

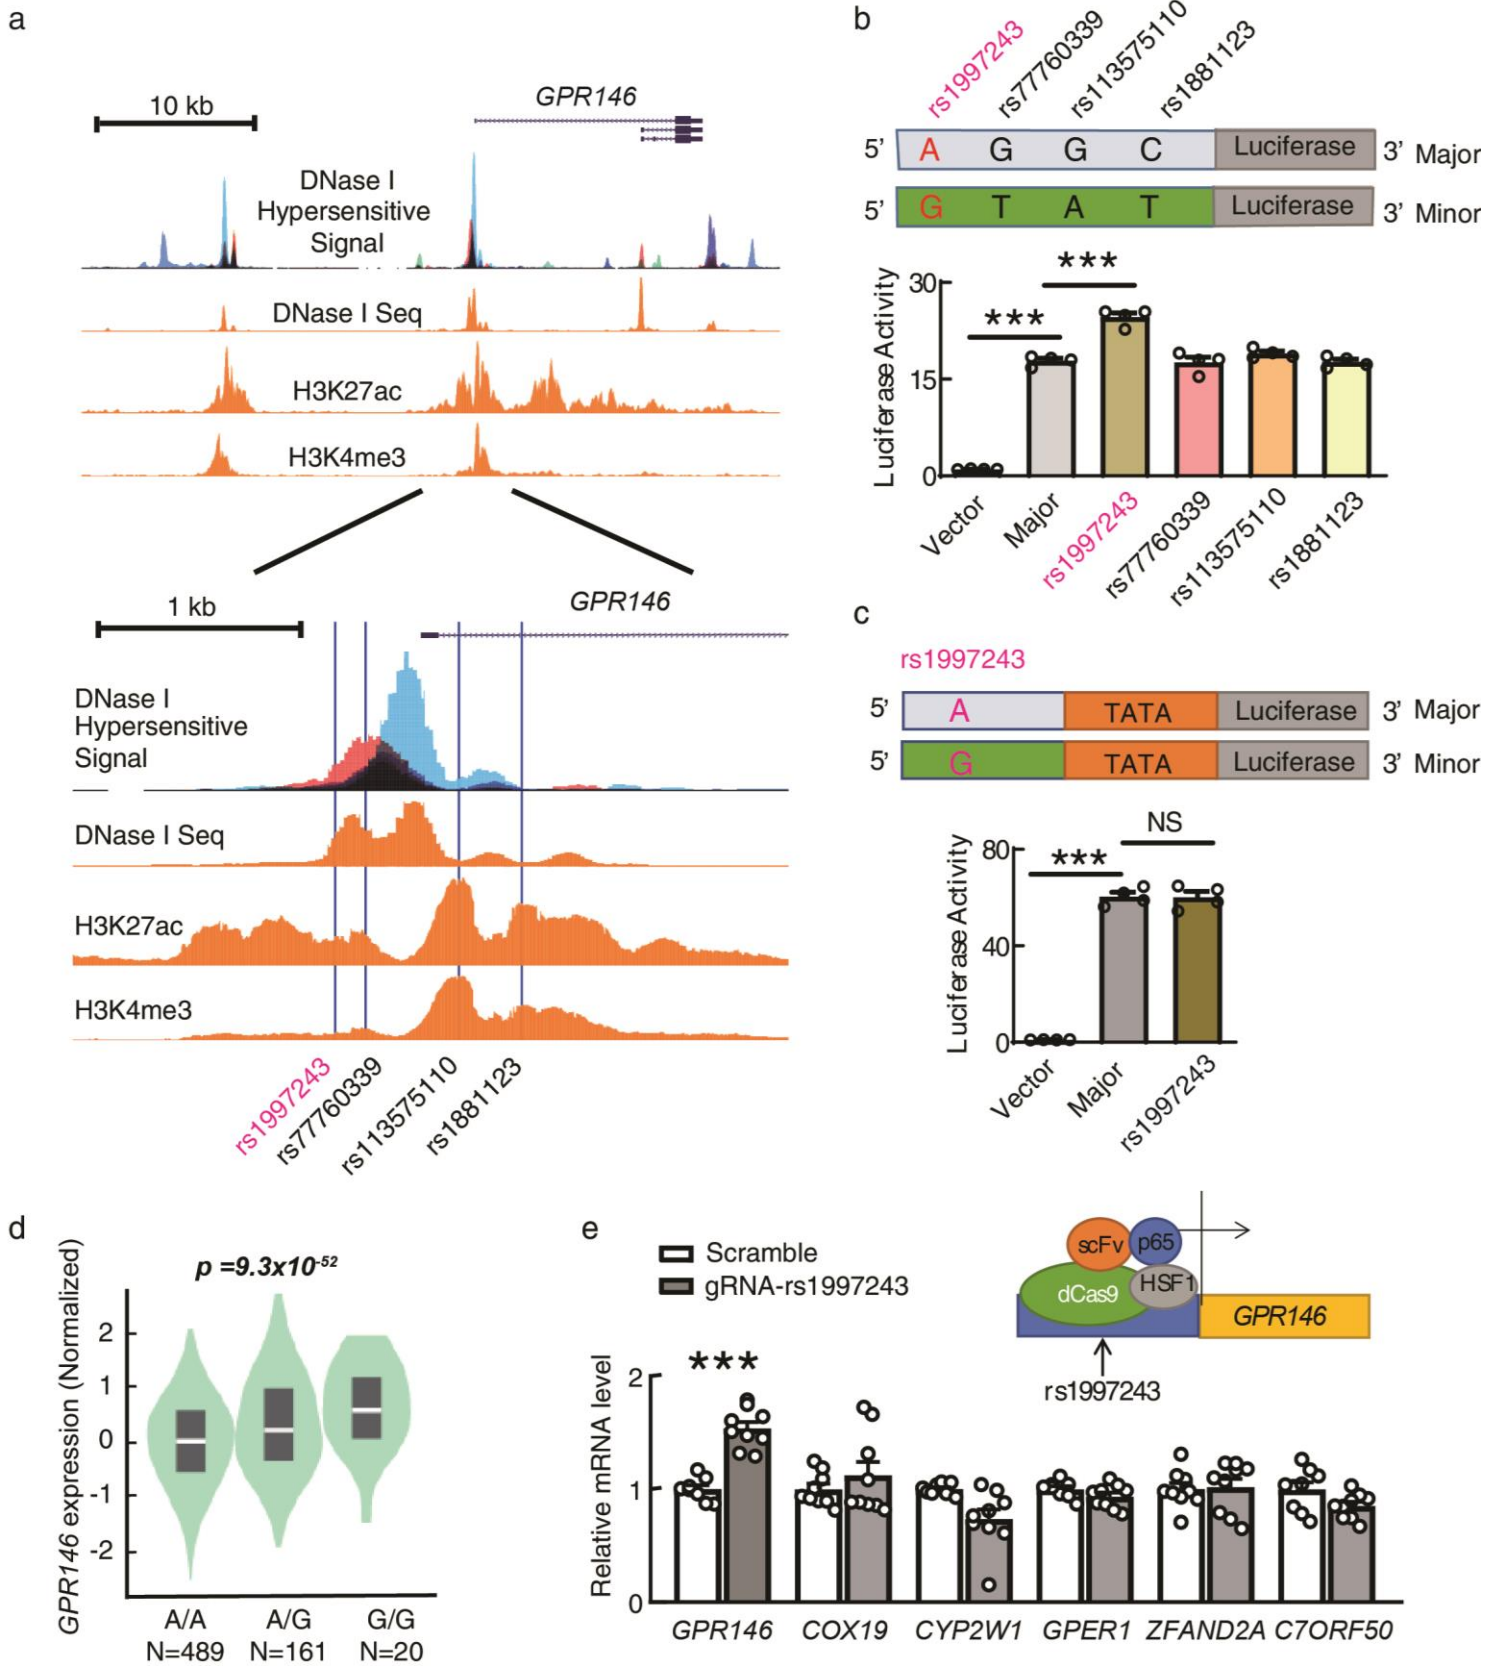

396 **Figure 1, rs1997243 is the disease-causing variant in 7p22 locus. a,** Genome active regions in 7p22  
397 locus. Genome active regions are marked by DNase I hypersensitive signal from 95 cell lines and DNase  
398 I seq, H3K27ac Chip-seq, H3K4me3 Chip-seq signals from human liver samples. Data were downloaded  
399 from ENCODE and plotted with UCSC Genome Brower as described in Methods. The lead SNP  
400 rs1997243 and three other SNPs that have strong linkage disequilibrium with rs1997243 are located in  
401 one of the genome active region close to the transcriptional starting site of *GPR146*. **b,** rs1997243 minor  
402 allele increases the promoter activity of the genome sequence. Genome sequence covering different SNPs  
403 was cloned into upstream of luciferase reporter gene. Plasmid with reference allele (Major) or each of the  
404 minor allele (Minor) was transfected into HepG2 cells separately. The luciferase activity was assayed as  
405 described in Methods. Luciferase activity in the vector-transfected cells was set to 1. **c,** rs1997243 does  
406 not change the enhancer activity of the genome sequence. Genome sequence covering the reference allele  
407 (Major) or rs1997243 risk allele (Minor) was cloned into upstream of TATA box mini-promoter followed  
408 by luciferase reporter gene. The luciferase activity was assayed and analyzed exactly the same as in **b.** **d,**  
409 rs1997243 G-allele is significantly associated with increased expression of *GPR146* in human. eQTL  
410 analysis for rs1997243 was performed in 670 human whole blood samples as described in Methods. **e,**  
411 Transcriptional activation of rs1997243 site increases *GPR146* expression in HepG2 cells. The  
412 transcription activator complex (scFV, p65, HSF1) was targeted to rs1997243 site through enzymatic dead  
413 Cas9 (dCas9) together with a specific gRNA sequence to rs1997243 position in HepG2 cells. Gene  
414 expression levels were assayed by RT-PCR analysis. All data are expressed as means  $\pm$  SEM and *p* values  
415 were calculated using Student's test (\*\*\*) $p < 0.001$ ).

Figure 2

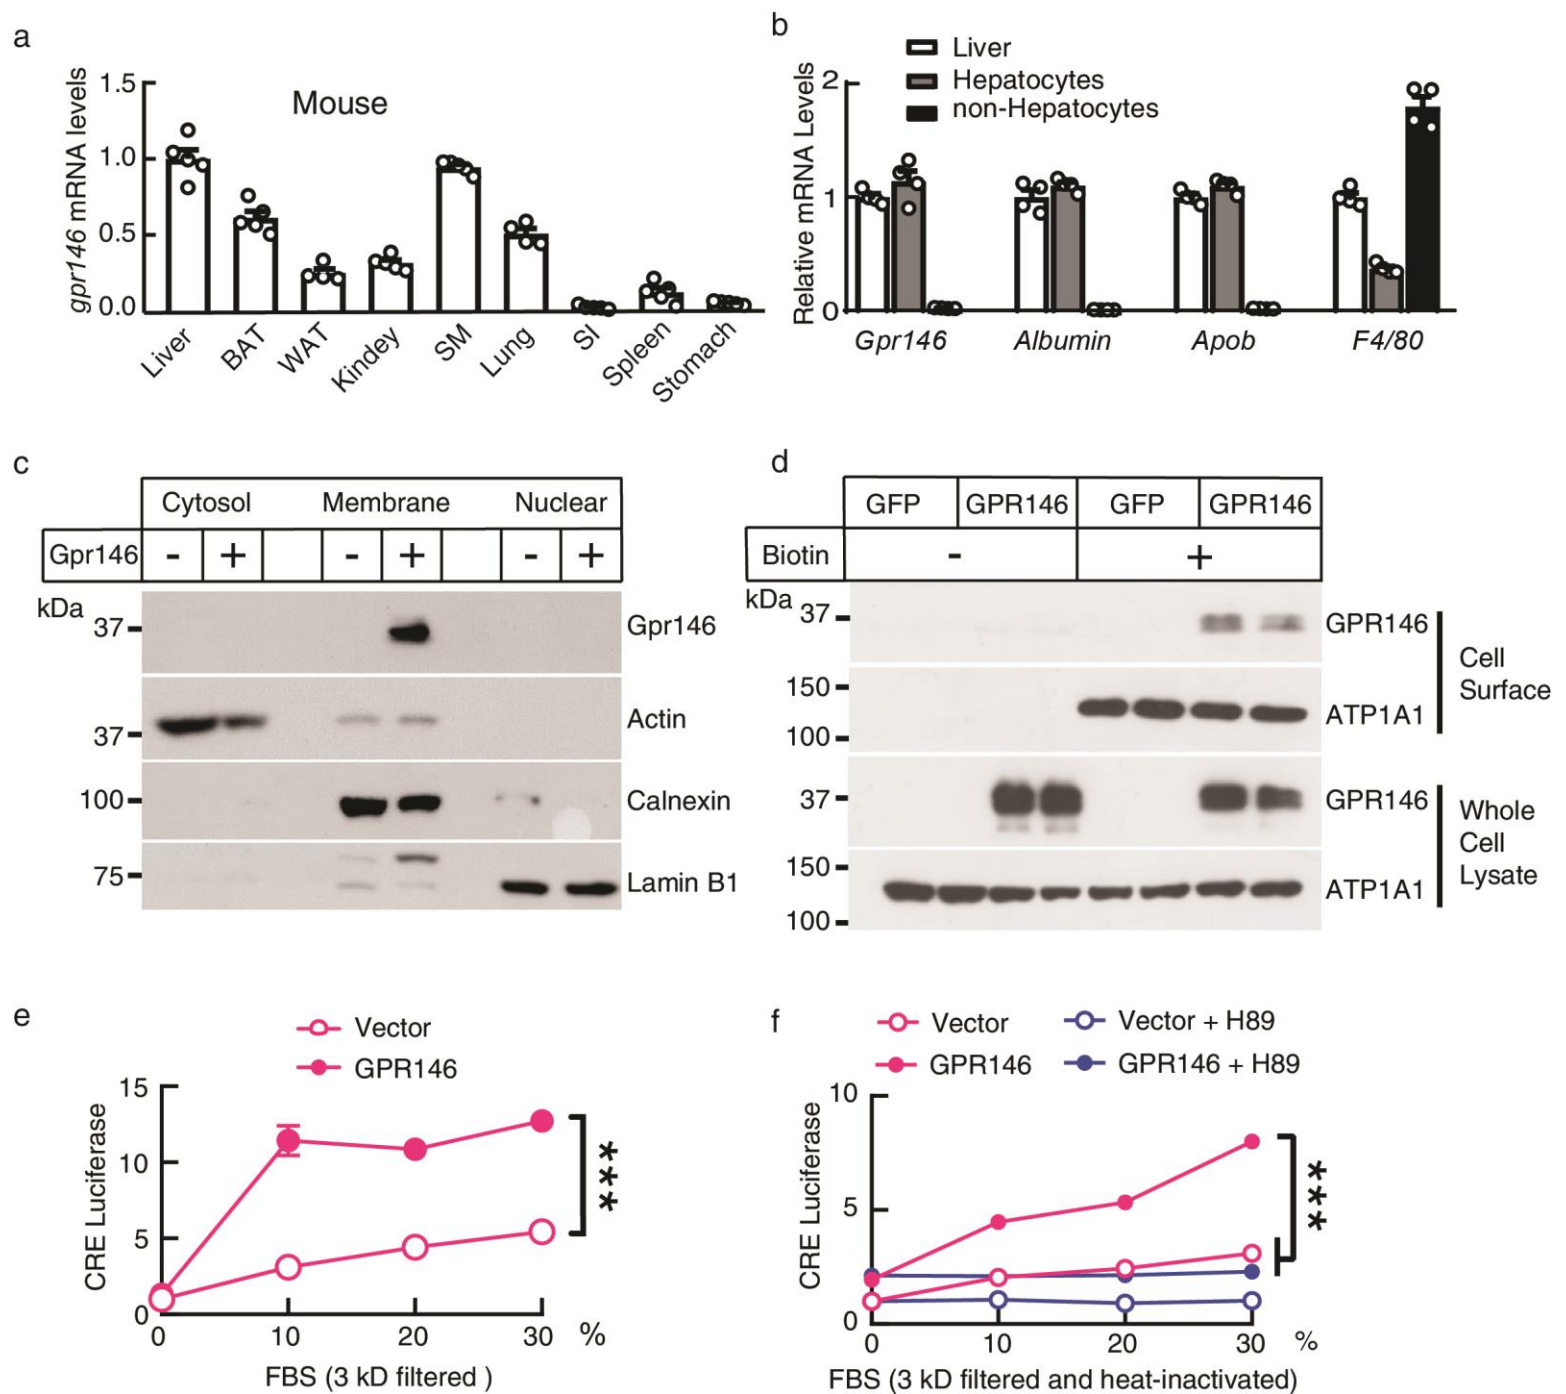

417 **Figure 2, GPR146 localizes on plasma membrane and responds to serum stimulation.** a, Tissue  
 418 distribution of *gpr146* in mice. C57BL/6J wild type mice were fast overnight and indicated tissues were  
 419 collected for RT-PCR analysis. Expression levels were normalized to liver which was set to 1 (N=5, male,  
 420 8 weeks). BAT, brown adipose tissue; WAT, white adipose tissue; SM, skeletal muscle; SI, small intestine.

421 **b.** *Gpr146* is specifically expressed in hepatocytes of mouse liver. Primary hepatocytes and non-  
422 hepatocytes are separated and subjected to RT-PCR analysis as described in Methods. *Albumin* and *Apob*  
423 are hepatocytes marker genes, *F4/80* is a macrophage marker gene. **c.** Gpr146 is located in membrane  
424 fraction. Flag tagged Gpr146 was expressed in 293T cells by transient transfection. Cytosol, membrane  
425 and nuclear fractions were isolated as described in Methods. Gpr146 was detected with anti-Flag antibody.  
426 Actin, Calnexin and Lamin B1 were used as markers for each fraction. **d.** GPR146 is located on plasma  
427 membrane. GPR146 tagged with Flag was expressed in 293T cells by transient transfection. Cell surface  
428 fraction was isolated with biotinylation in part of the cells as described in Methods. GPR146 was detected  
429 with an anti-GPR146 polyclonal antibody. ATP1A1 was used a cell surface marker. **e.** GPR146 responses  
430 to 3 kD filtered serum and activates cAMP response element (CRE) activity. HEK293 cells expressing  
431 empty vector or GPR146 together with CRE-Luciferase reporter were treated with indicated amount of  
432 fetal bovine serum (FBS) that has passed through the 3 kD cut-off filter. Luciferase activities were  
433 measured accordingly. **f.** GPR146 responses to heat-inactivated serum and activates CRE activity through  
434 PKA pathway. HepG2 cells expressing empty vector or GPR146 together with CRE-Luciferase reporter  
435 were treated with indicated amount of FBS that has passed through the 3 kD cut-off filter and further heat-  
436 inactivated by boiling. Part of the cells was treated in the presence of PKA inhibitor H-89 (10  $\mu$ m). All  
437 data are expressed as means  $\pm$  SEM and *p* values were calculated using Student's test (\*\*\*)*p*<0.001). All  
438 experiments were repeated at least twice with similar results.



Figure 3

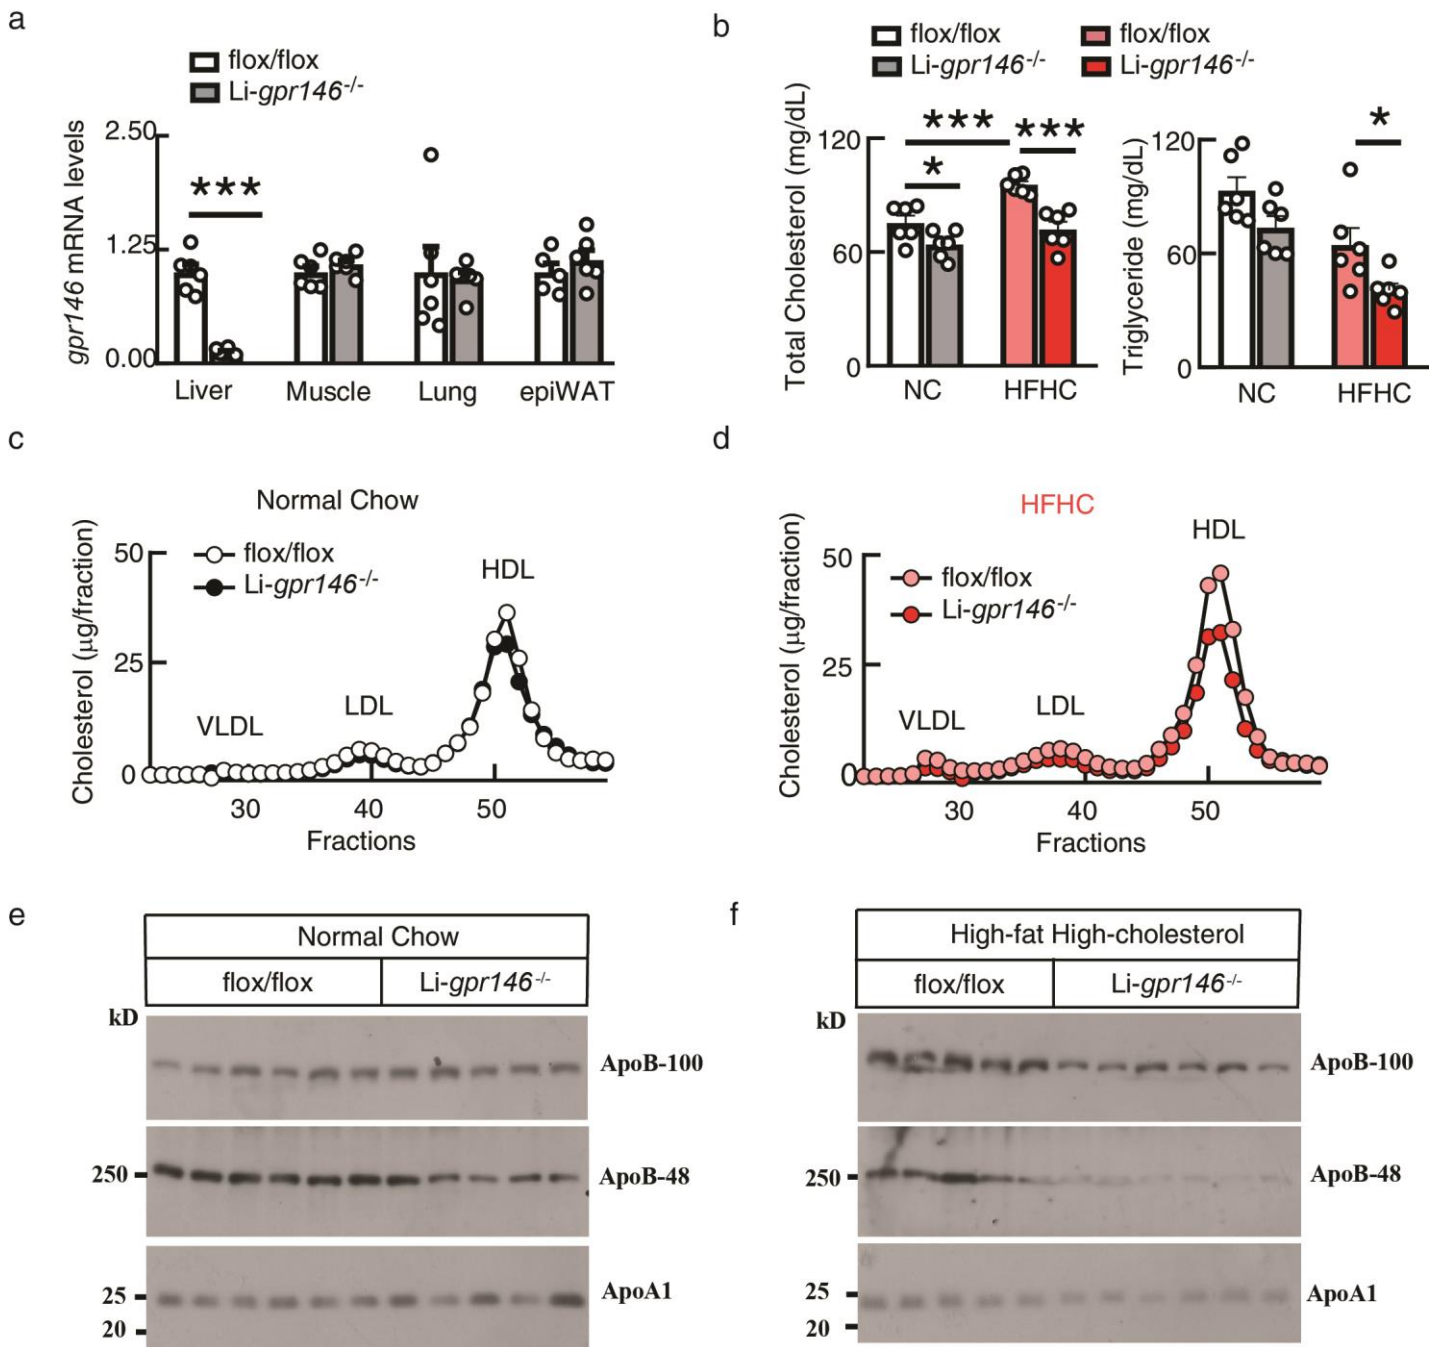

440 **Figure 3, Liver specific *gpr146* knockout mice have decreased blood cholesterol level and are**  
 441 **protected from high-fat high-cholesterol diet induced hypercholesterolemia. a, *Gpr146* expression**  
 442 **levels in liver specific *gpr146* knockout mice (*Li-gpr146*<sup>-/-</sup>) and their littermate controls. Indicated tissues**  
 443 **were collected from mice fasted for 3 hours in the early morning and subjected to RT-PCR analysis.**  
 444 **Expression levels were normalized to the control group which was set to 1 (N=6, female, 7-8 weeks).**

445 epiWAT: epididymal white adipose tissue. **b**, *Li-gpr146<sup>-/-</sup>* mice have decreased blood cholesterol level  
446 compared with their littermate controls. Blood was collected from overnight fasted mice fed with normal  
447 chow (NC) or high-fat high-cholesterol (HFHC) for 2 weeks. Plasma levels of total cholesterol and  
448 triglyceride were measured as described in Methods (N=6, female, 10-13 weeks). **c**, **d**, Pooled plasma  
449 from **b** was fractionated by Fast Protein Liquid Chromatography. Cholesterol concentration in each fraction  
450 was measured accordingly. **e**, **f**, Plasma levels of ApoB and ApoA1 in *Li-gpr146<sup>-/-</sup>* and control mice.  
451 Plasma from **b** was separated on SDS-PAGE and subjected to immunoblot analysis as described in  
452 Methods. All data are expressed as means  $\pm$  SEM and *p* values were calculated using Student's test  
453 (\**p*<0.05, \*\*\**p*<0.001). All experiments were repeated at least twice with similar results.



Figure 4

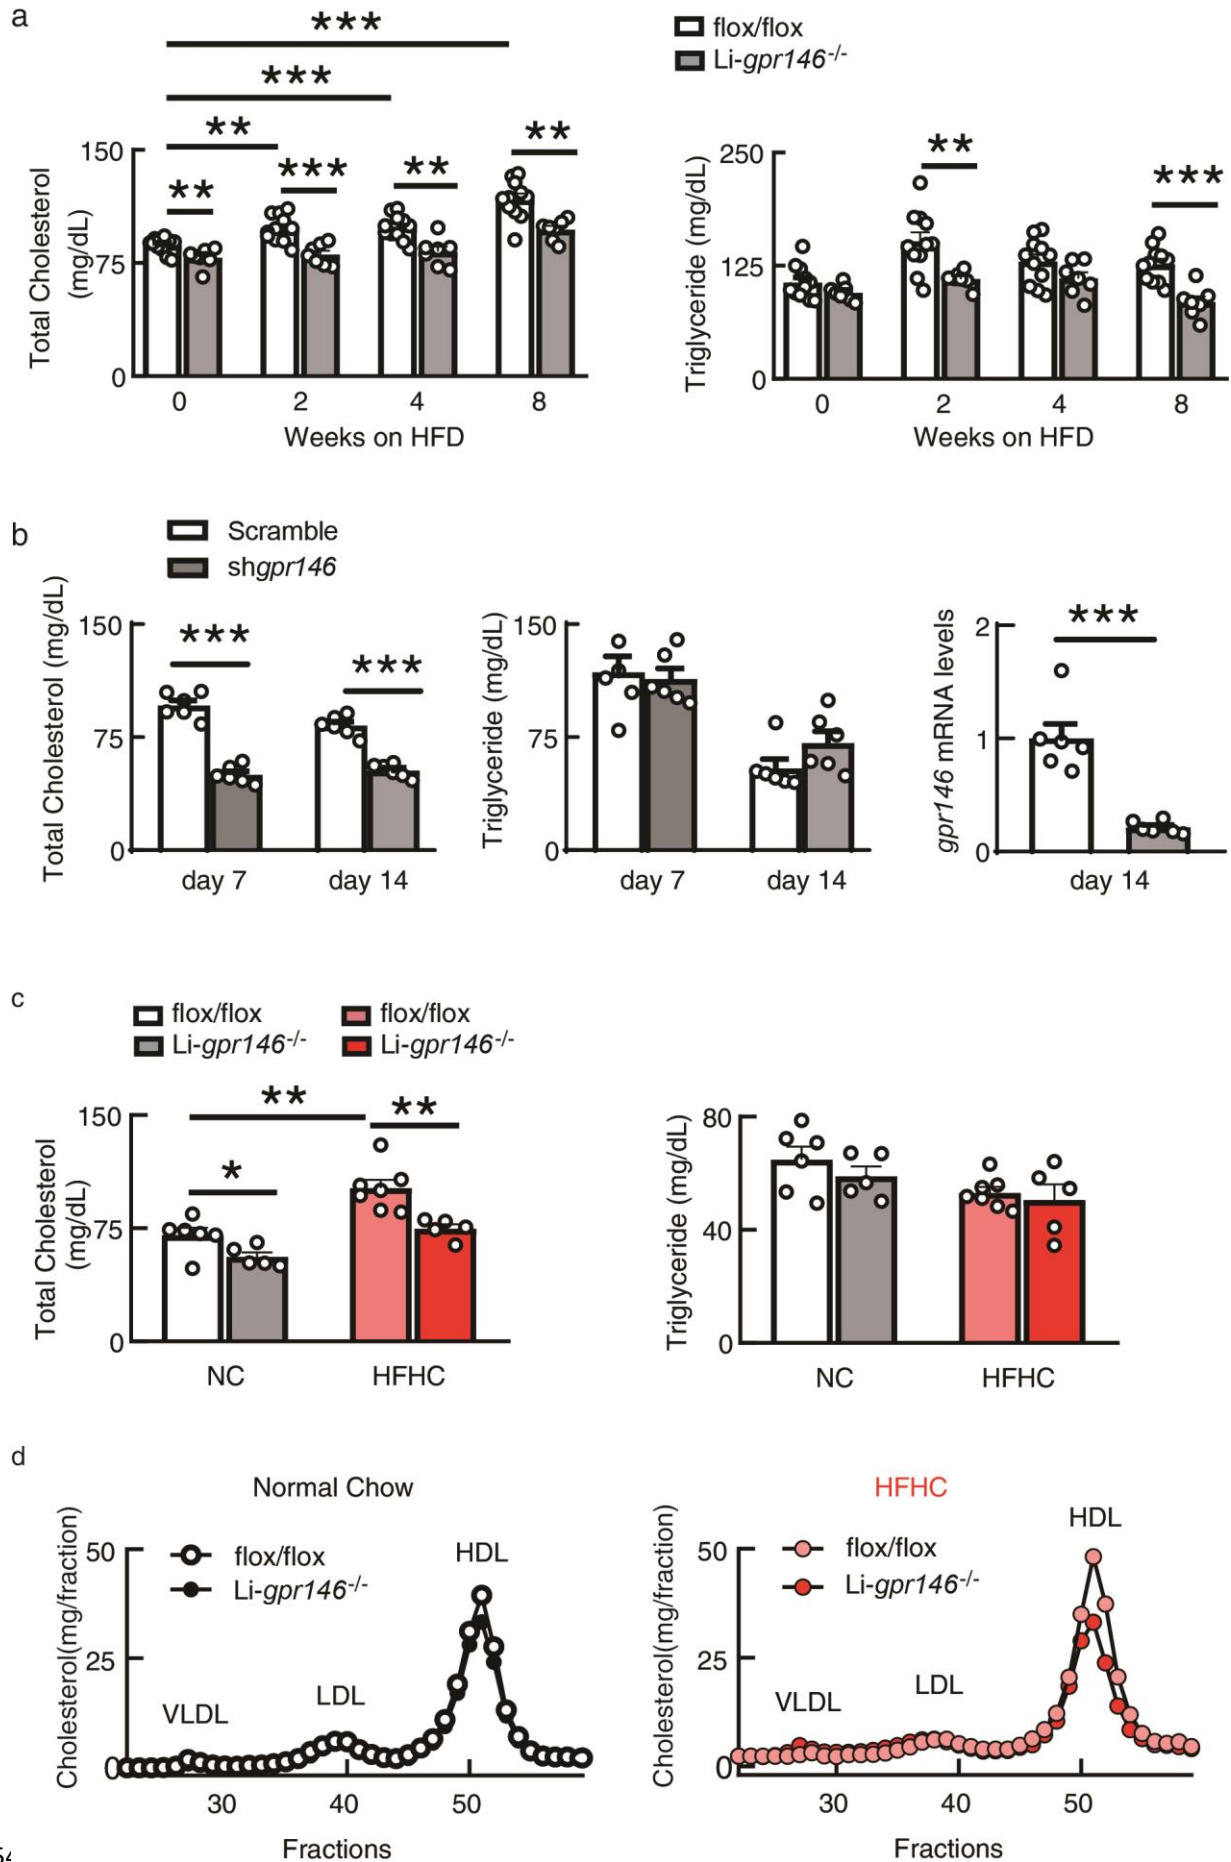

455 **Figure 4, Decreased blood cholesterol level in Li-*gpr146*<sup>-/-</sup> and *gpr146* knocking down mice. a,** Li-  
456 *gpr146*<sup>-/-</sup> mice are protected from high-fat diet induced hypercholesterolemia. Mice were fed with high-  
457 fat diet (HFD) for eight weeks and blood was collected after overnight fasting at indicated time points.  
458 Plasma levels of total cholesterol and triglyceride were measured accordingly (N=7-11, male, 10-12  
459 weeks old when start feeding). **b,** Knocking down *gpr146* in livers of adult mice decreases blood  
460 cholesterol level. C57BL/6J wild type mice were infused with adeno-associated virus expressing a  
461 scramble or shRNA against *gpr146* through the tail veins. Blood was collected after overnight fasting at  
462 one and two weeks after injection. Plasma levels of total cholesterol and triglyceride were measured  
463 accordingly. Knocking down efficiency was measured by RT-PCR analysis in liver (right) (N=5, male, 8  
464 weeks). **c,** Plasma levels of cholesterol and triglyceride in Li-*gpr146*<sup>-/-</sup> mice derived from a second F1  
465 line. The flox/flox mice used in this experiment were derived by crossing line 96 and 97 of F1 mice (Fig  
466 S5b). Li-*gpr146*<sup>-/-</sup> and their littermate controls were fed with normal chow (NC) or high-fat high-  
467 cholesterol (HFHC) diet for 2 weeks (n=5-7/group, female, 9-11 weeks). **d,** Pooled plasma from c was  
468 fractionated by Fast Protein Liquid Chromatography. Cholesterol concentration for each fraction was  
469 measured enzymatically as described in Methods. All data are expressed as means ± SEM and *p* values  
470 were calculated using Student's test (\**p*<0.05, \*\**p*<0.01, \*\*\**p*<0.001). All experiments were repeated at  
471 least twice with similar results.

Figure S1

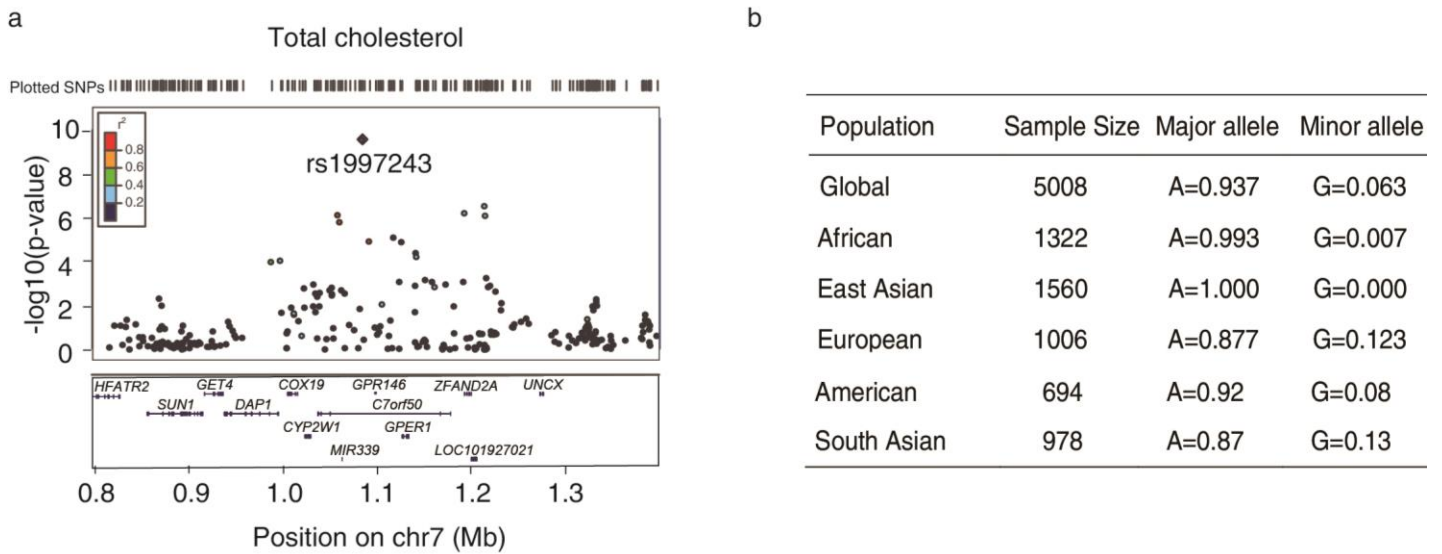

473 **Figure S1, 7p22 locus is strongly associated with total cholesterol level. a,** Reginal (7p22) plot of SNPs

474 associated with total cholesterol level with LocusZoom<sup>14</sup>. Note that rs1997243 is the lead SNP in this

475 locus. **b,** Allele frequency of rs1997243 in different populations from 1000 genome project.

Figure S2

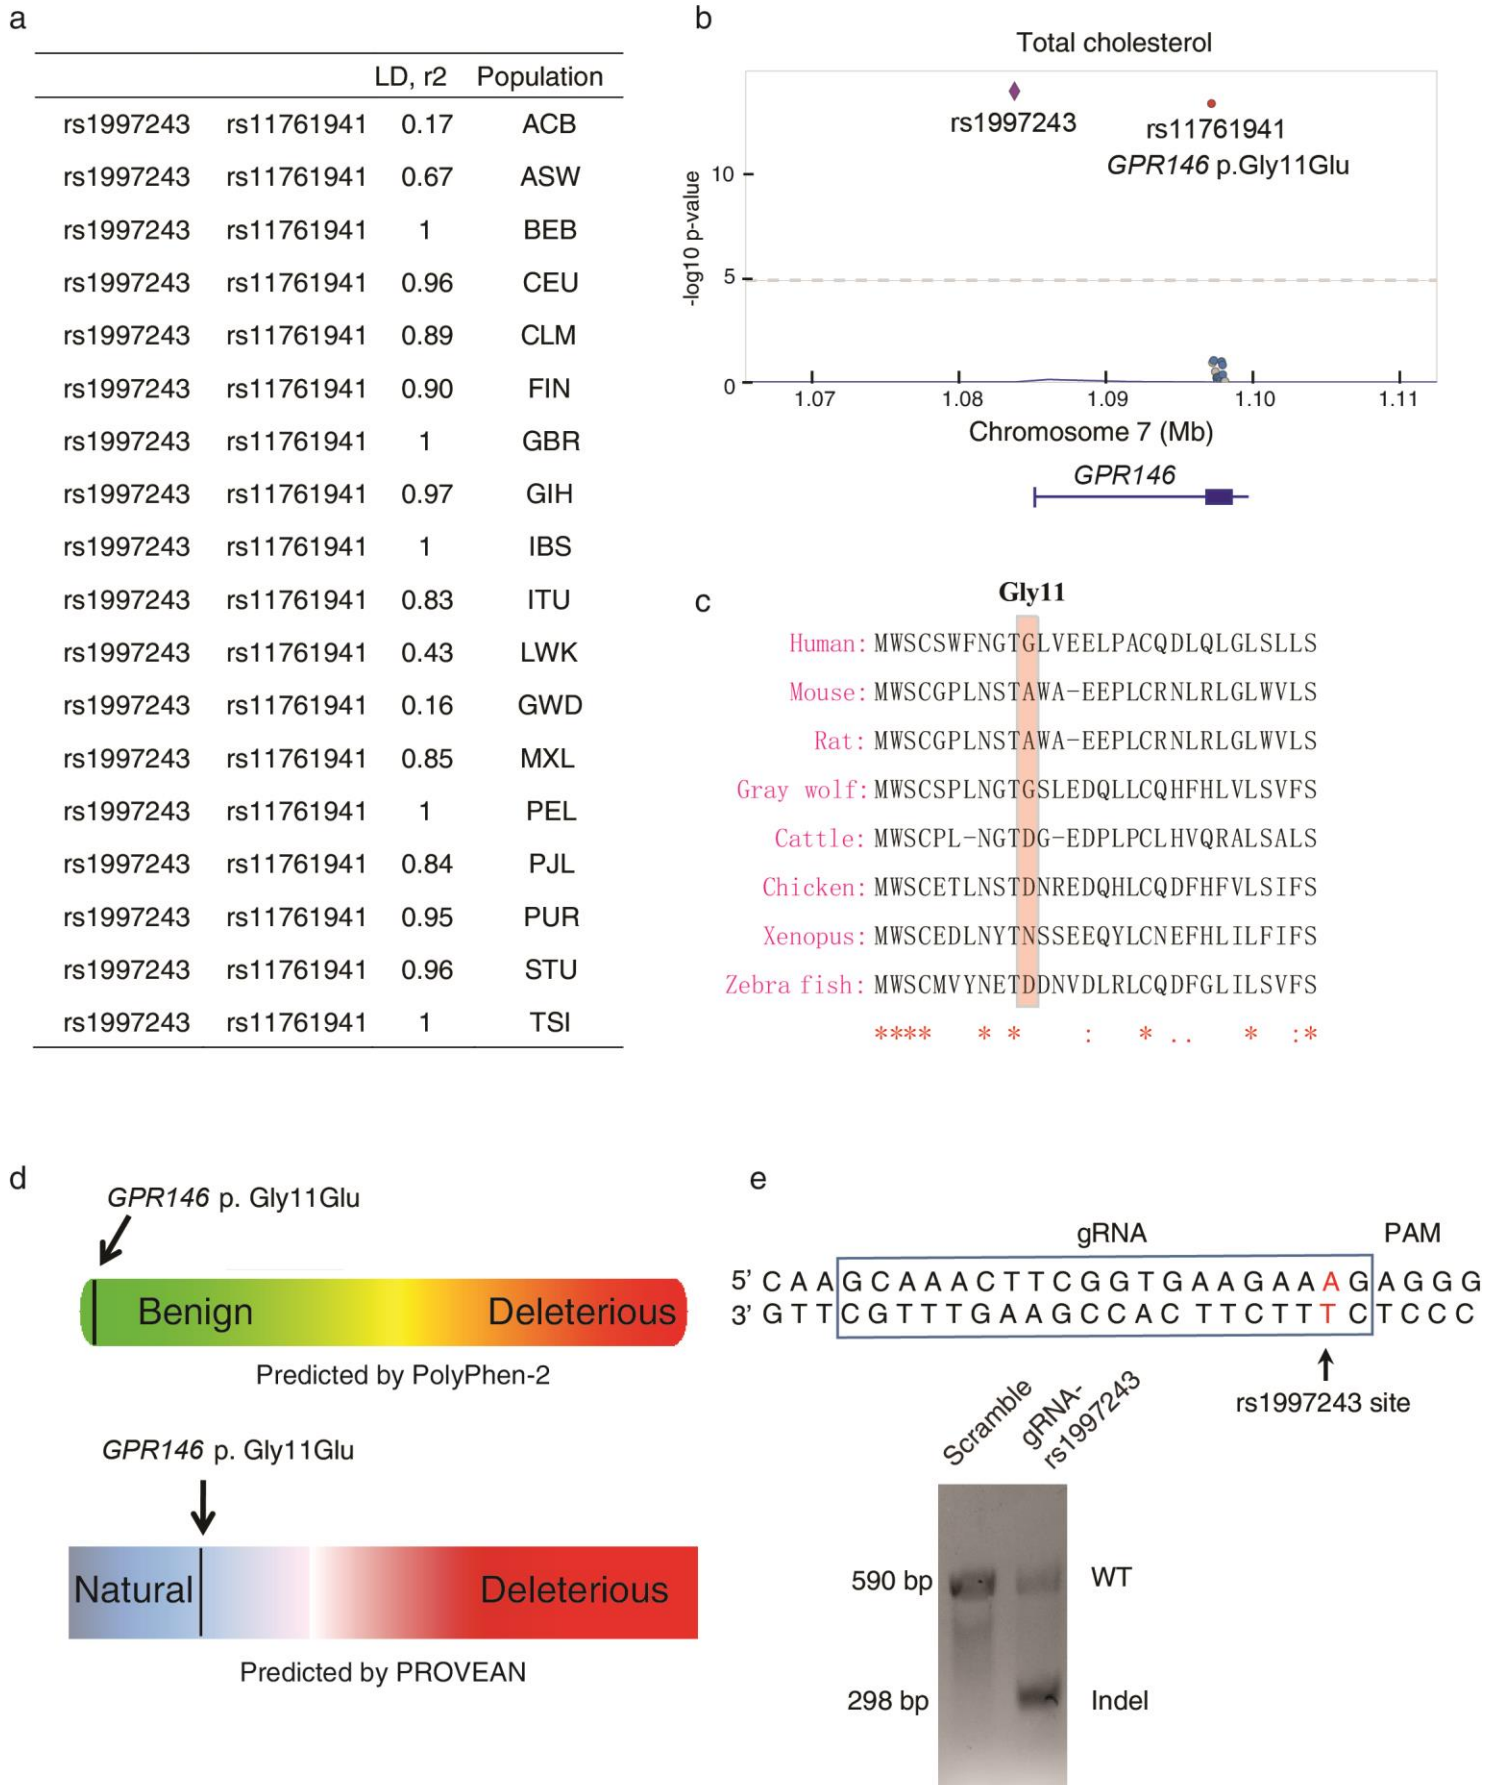

477 **Figure S2, rs11761941 (*GPR146* p. Gly11Glu) has strong linkage disequilibrium with lead SNP**  
478 **rs1997243 and are both associated with blood cholesterol level. a,** Linkage disequilibrium ( $r^2$ ) between  
479 rs1997243 and rs11761941 in different populations. LD ( $r^2$ ) was calculated with Ensemble LD calculator  
480 using data from 1000 genome phase 3. The population codes were exactly the same as described on  
481 Ensemble. **b,** Regional (7p22) plot of SNPs associated with total cholesterol level with LocusZoom<sup>28</sup>. **c,**  
482 Sequence alignment of GPR146 across different species. Gly11 is not conserved and has been substituted  
483 with Asp, Asn or Ala in other species except *Gray wolf*. **d,** *GPR146* p. Gly11Glu is predicted to be benign.  
484 Different software all predicts that the *GPR146* p. Gly11Glu variant is benign and natural. **e,** gRNA  
485 sequence targeting rs1997243 site. Boxed sequence is the gRNA sequence followed by the PAM sequence  
486 AGG. HepG2 cells stably expressing wild-type spCas9 were infected with lentivirus expressing this  
487 gRNA. The gRNA efficiency was evaluated with T7 endonuclease I digestion as described in Methods  
488 (lower panel). The result indicates that this gRNA is effective in targeting rs1997243 site and is used for  
489 enzymatic dead Cas9-mediated activation system (Fig 1e).

Figure S3

a

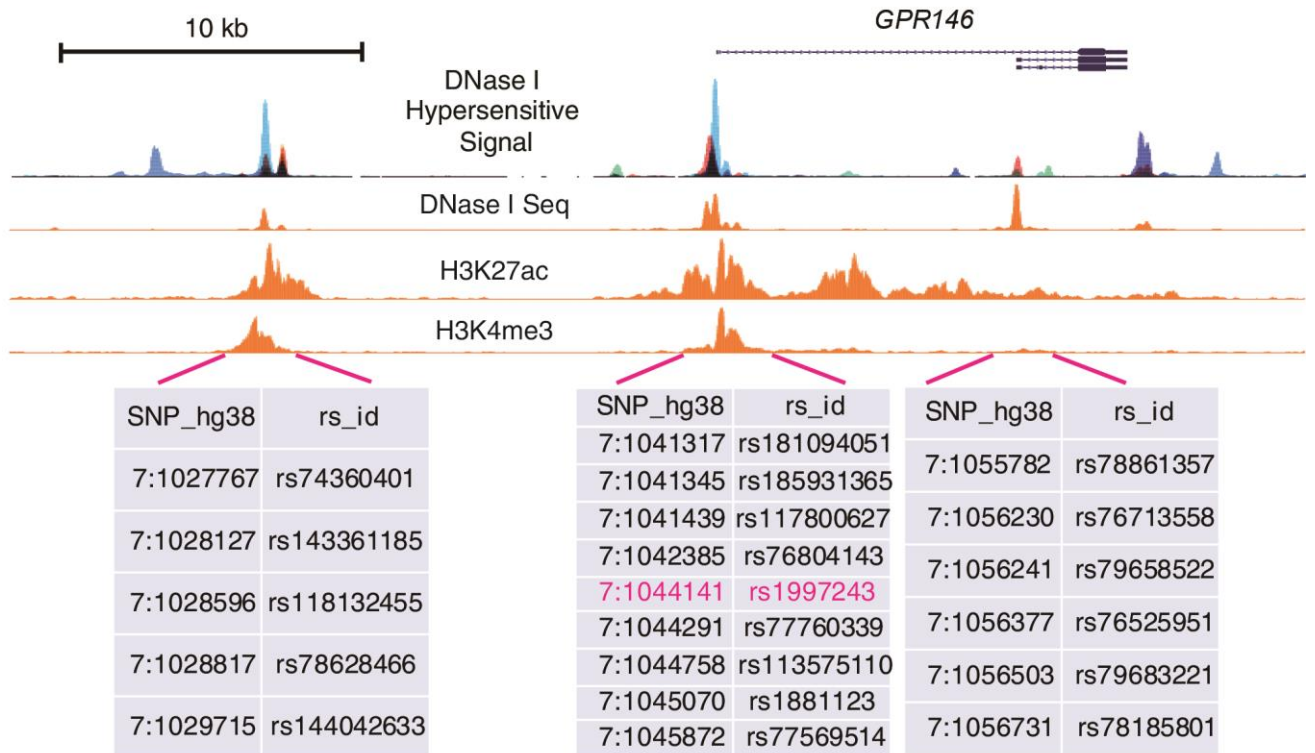

b

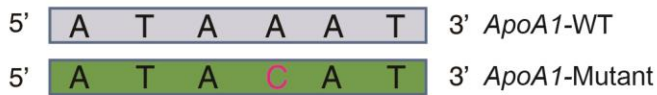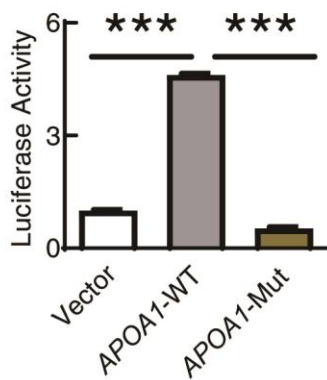

c

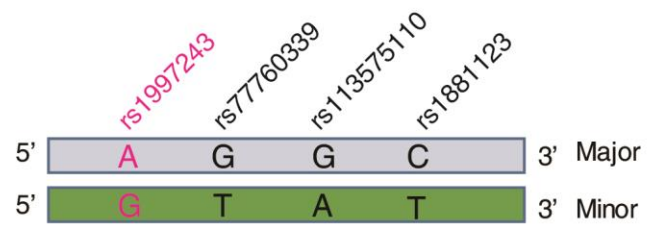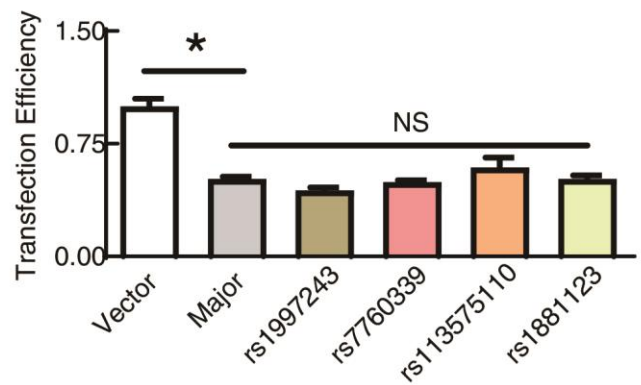



Figure S3

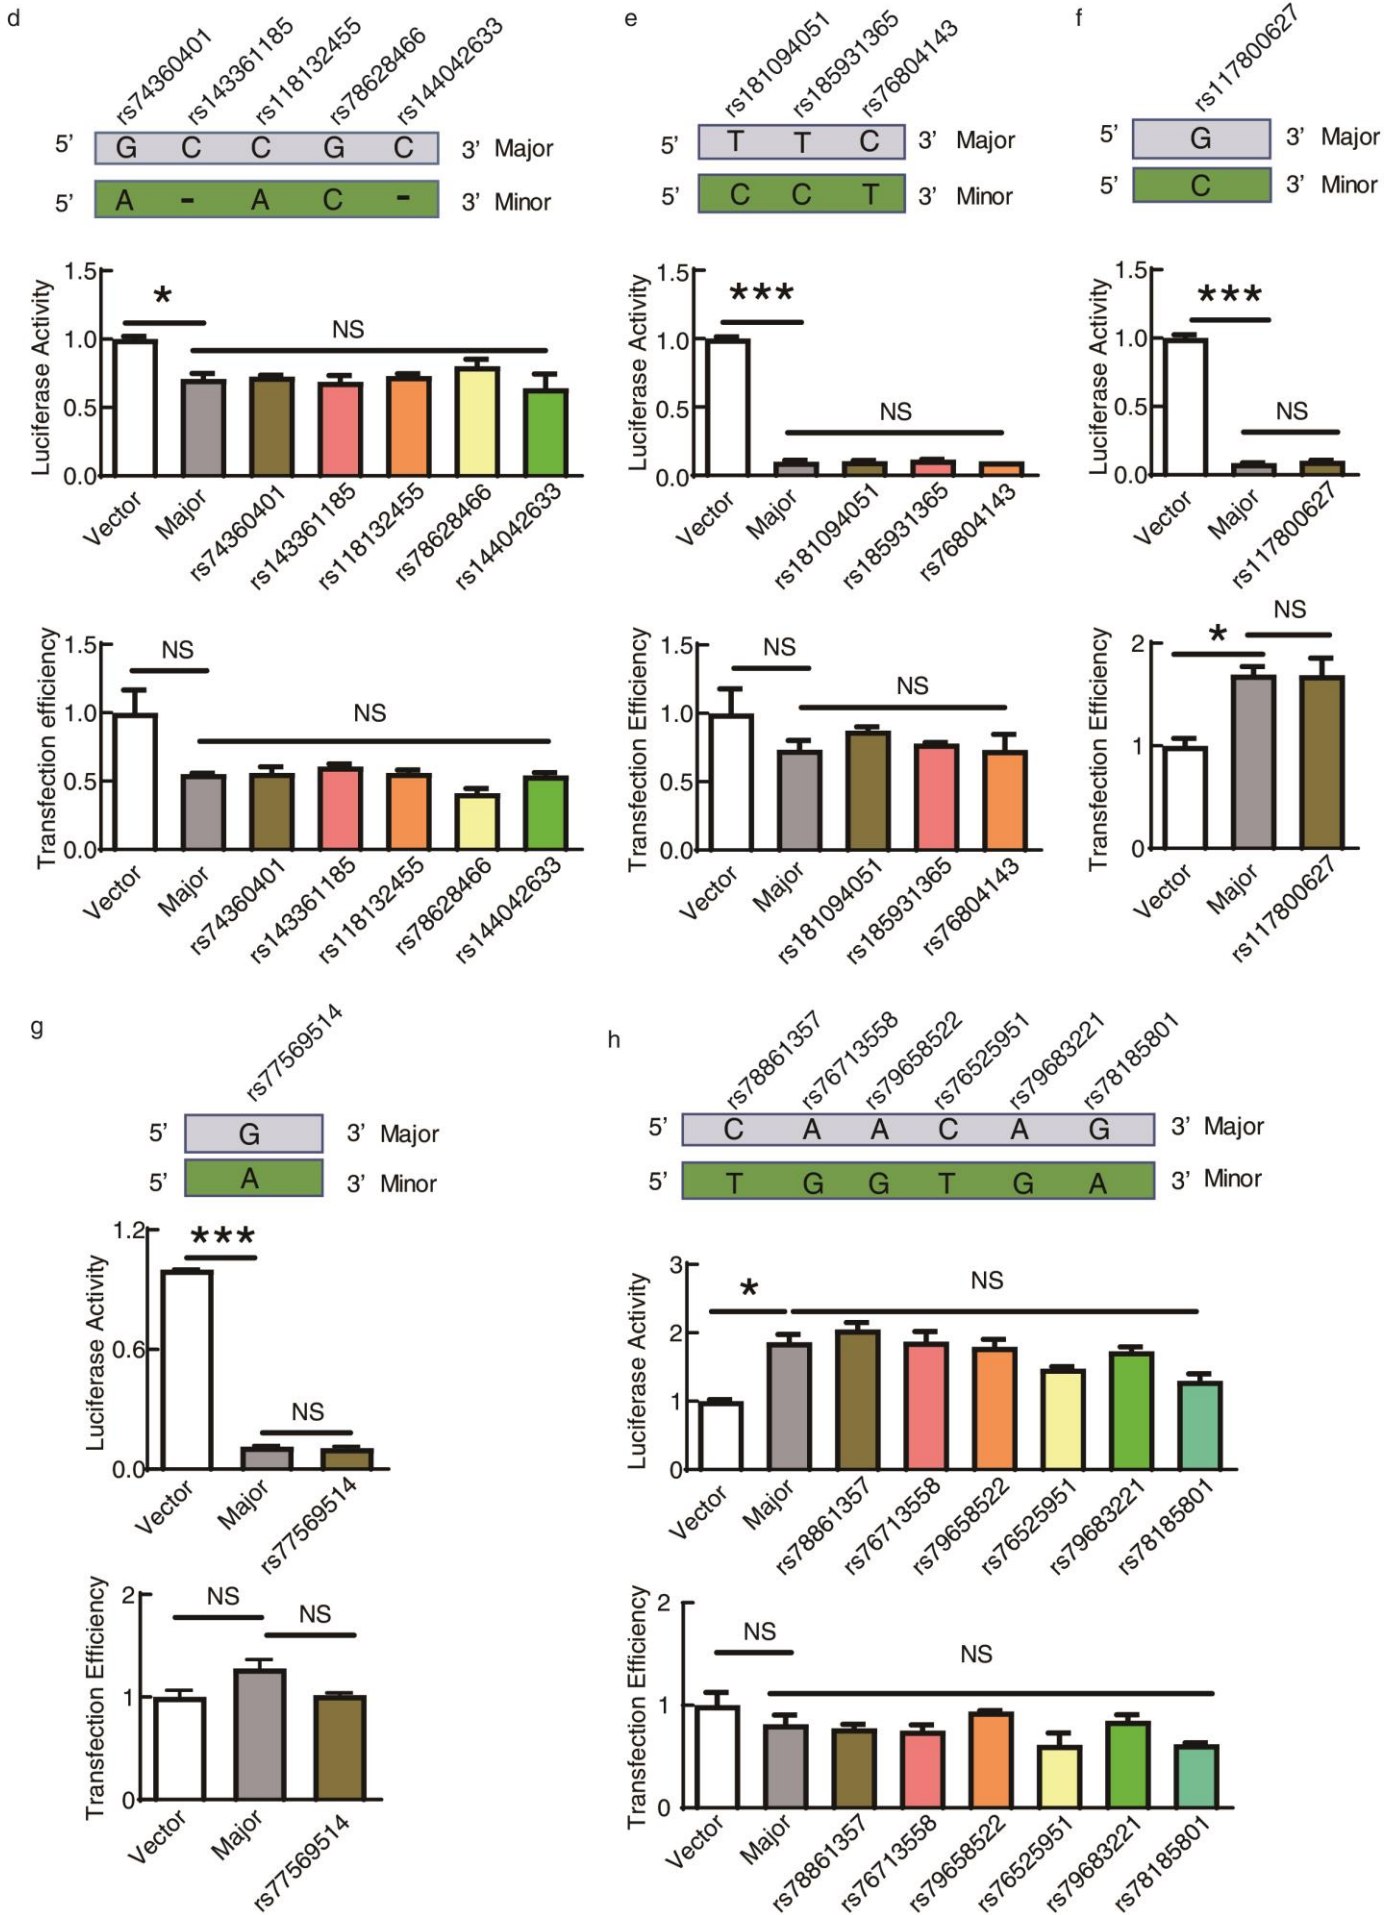

Figure S3

i

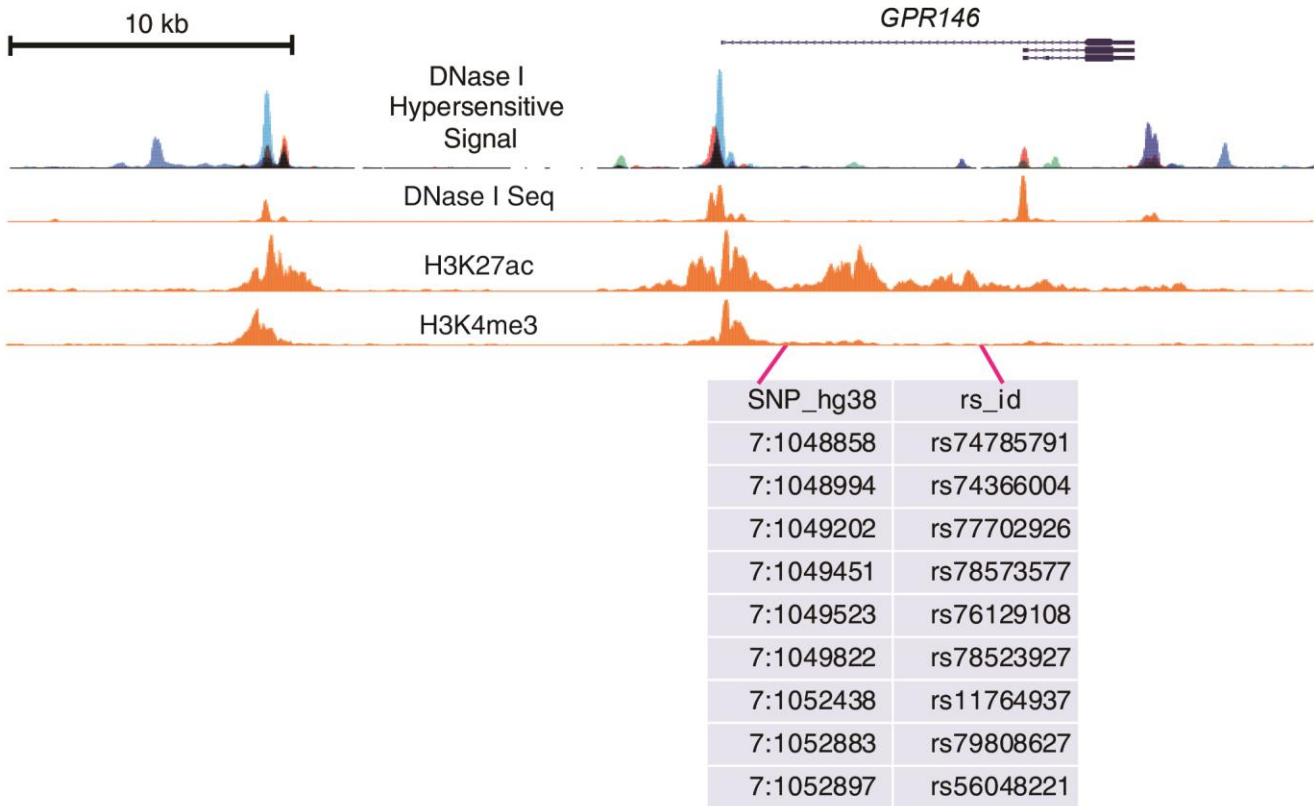

j

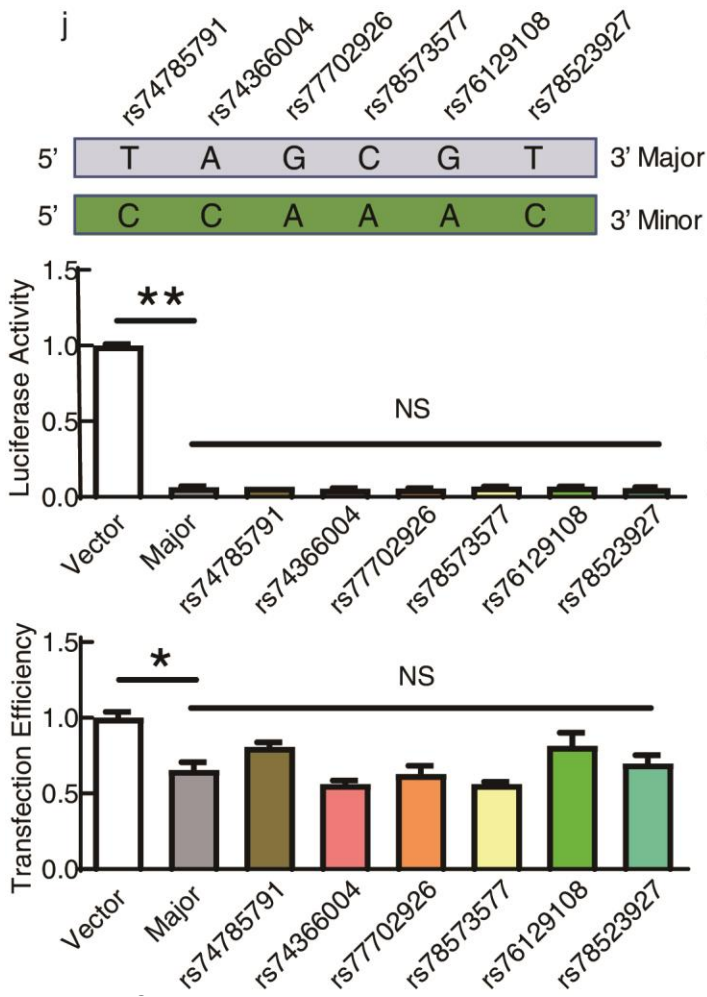

k

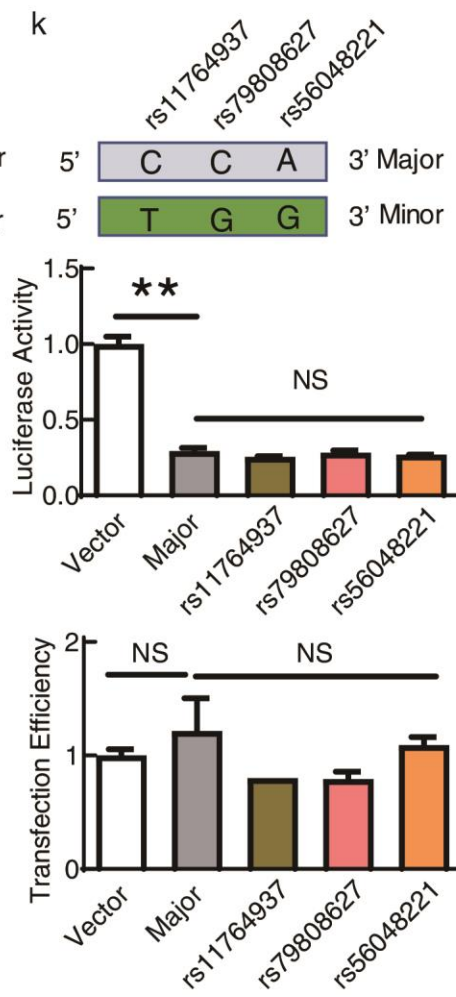

l

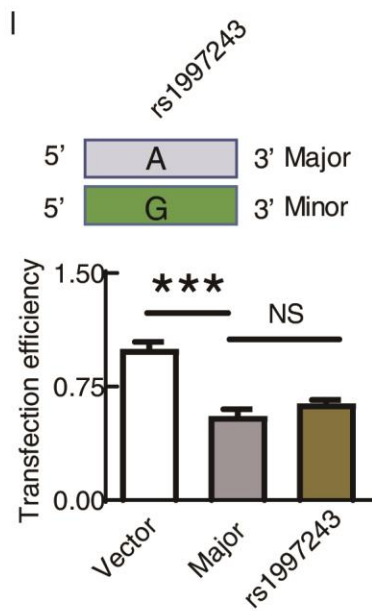



493 **Figure S3, Characterization of SNPs in 7p22 locus. a,** SNPs that have strong linkage disequilibrium  
494 with lead SNP rs1997243 and are located in genome active regions are listed in the tables. Linkage  
495 disequilibrium (LD,  $r^2$ ) was calculated with data from 1000 genome phase 3 as described in Methods.  
496 Genome active regions were identified by DNase I hypersensitive signal from 95 cell lines and DNase I  
497 seq, H3K27ac Chip-seq, H3K4me3 Chip-seq signals from human liver samples. SNPs with  $r^2 > 0.8$  and  
498 localized in the genome active regions are listed in the tables and subjected to further functional study. **b,**  
499 Luciferase reporter activity for *ApoA1* promoter sequence which is used as control for the assay. *ApoA1*  
500 wild-type (WT) promoter or its single base pair mutant was cloned into upstream of *firefly* luciferase.  
501 *Firefly* luciferase activity was measured and normalized with *renilla* luciferase activity, with vector group  
502 was set to 1. **c,** Transfection efficiency for experiment described in Fig 1b. After transfection, cells were  
503 harvested and genomes DNA were extracted and subjected to real-time PCR analyze as described in  
504 Methods. **d-h,** Luciferase reporter activities and their transfection efficiency for all SNPs listed in Fig S3a  
505 as described in Fig 1b and Fig S3c. **i,** SNPs have strong linkage disequilibrium with lead SNP rs1997243  
506 and are located in H3K27ac marked region. **j-k,** Luciferase reporter activities and their transfection  
507 efficiency for all SNPs listed in Fig S3i. **l,** Transfection efficiency for experiment Fig 1c. All data are  
508 expressed as means  $\pm$  SEM and  $p$  values were calculated using Student's test ( $*p < 0.05$ ,  $**p < 0.01$ ,  
509  $***p < 0.001$ ). All experiments were repeated at with similar results.

Figure S4

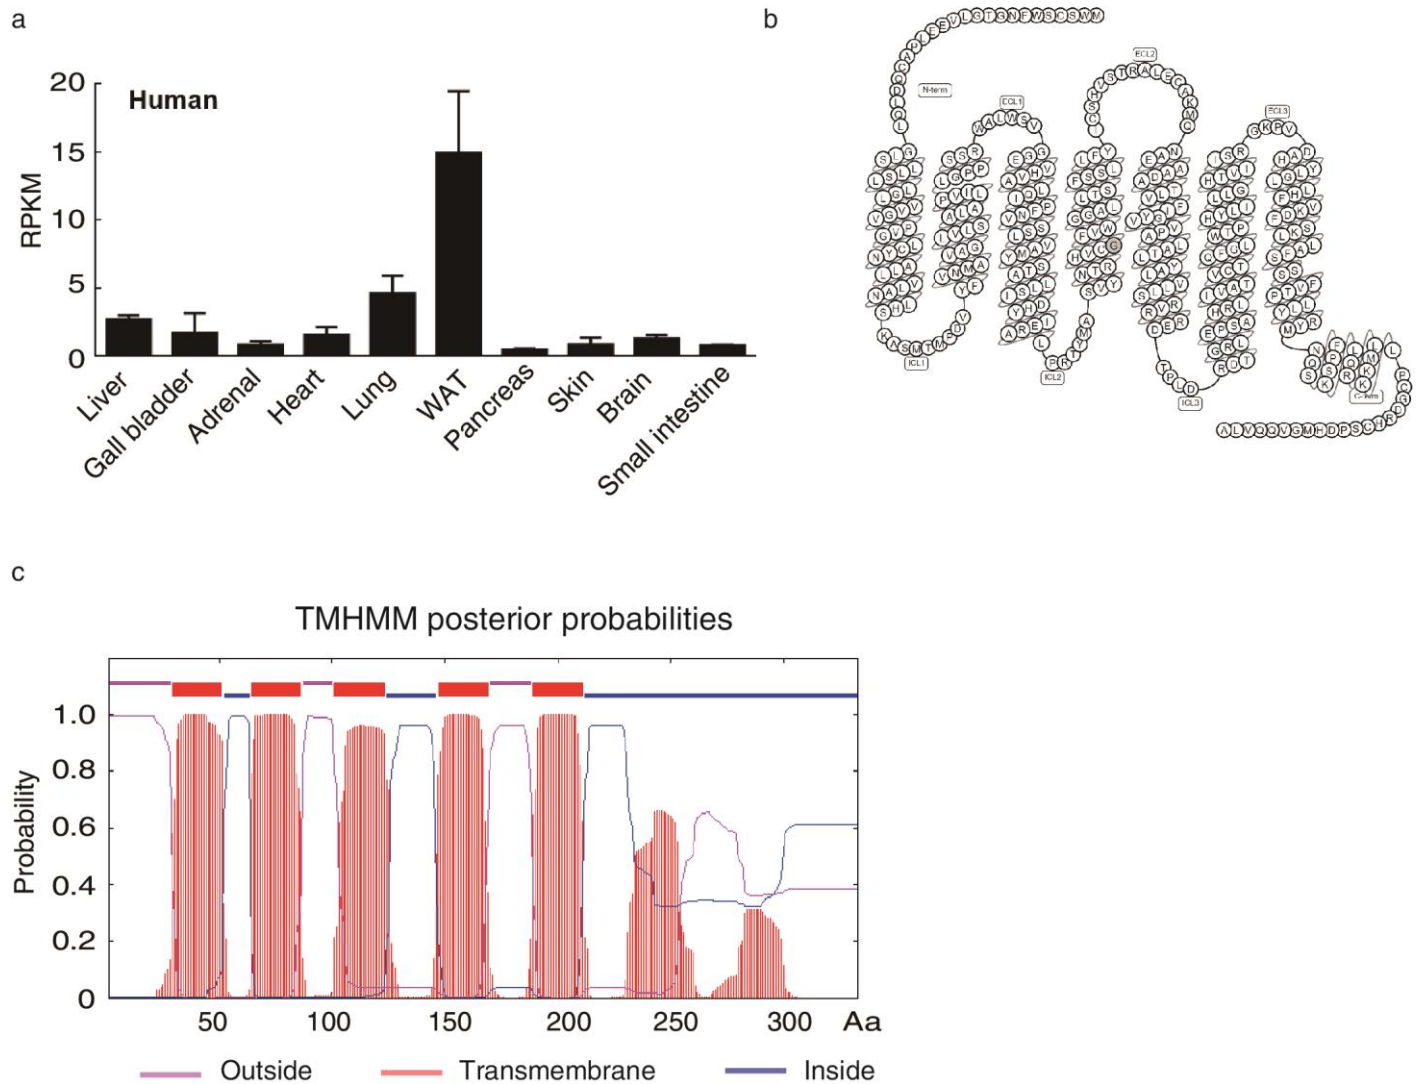

511 **Figure S4, Gpr146 is a typical GPCR that is specifically expressed in hepatocytes of mouse liver.**

512 **a**, Tissue distribution of *GPR146* in normal human tissues. Human *GPR146* expression data was

513 downloaded from NCBI with HPA RNA-seq normal tissues dataset. **b**, Topology of human GPR146.

514 The human GPR146 topology was generated from gpcr database (<https://www.gpcrdb.org/>). **d**, Human

515 GPR146 is predicted to have 7 transmembrane domains with N terminal facing extracellular

516 compartment. Transmembrane domain prediction was performed with TMHMM server V.2.0 as

517 described in Methods.

Figure S5

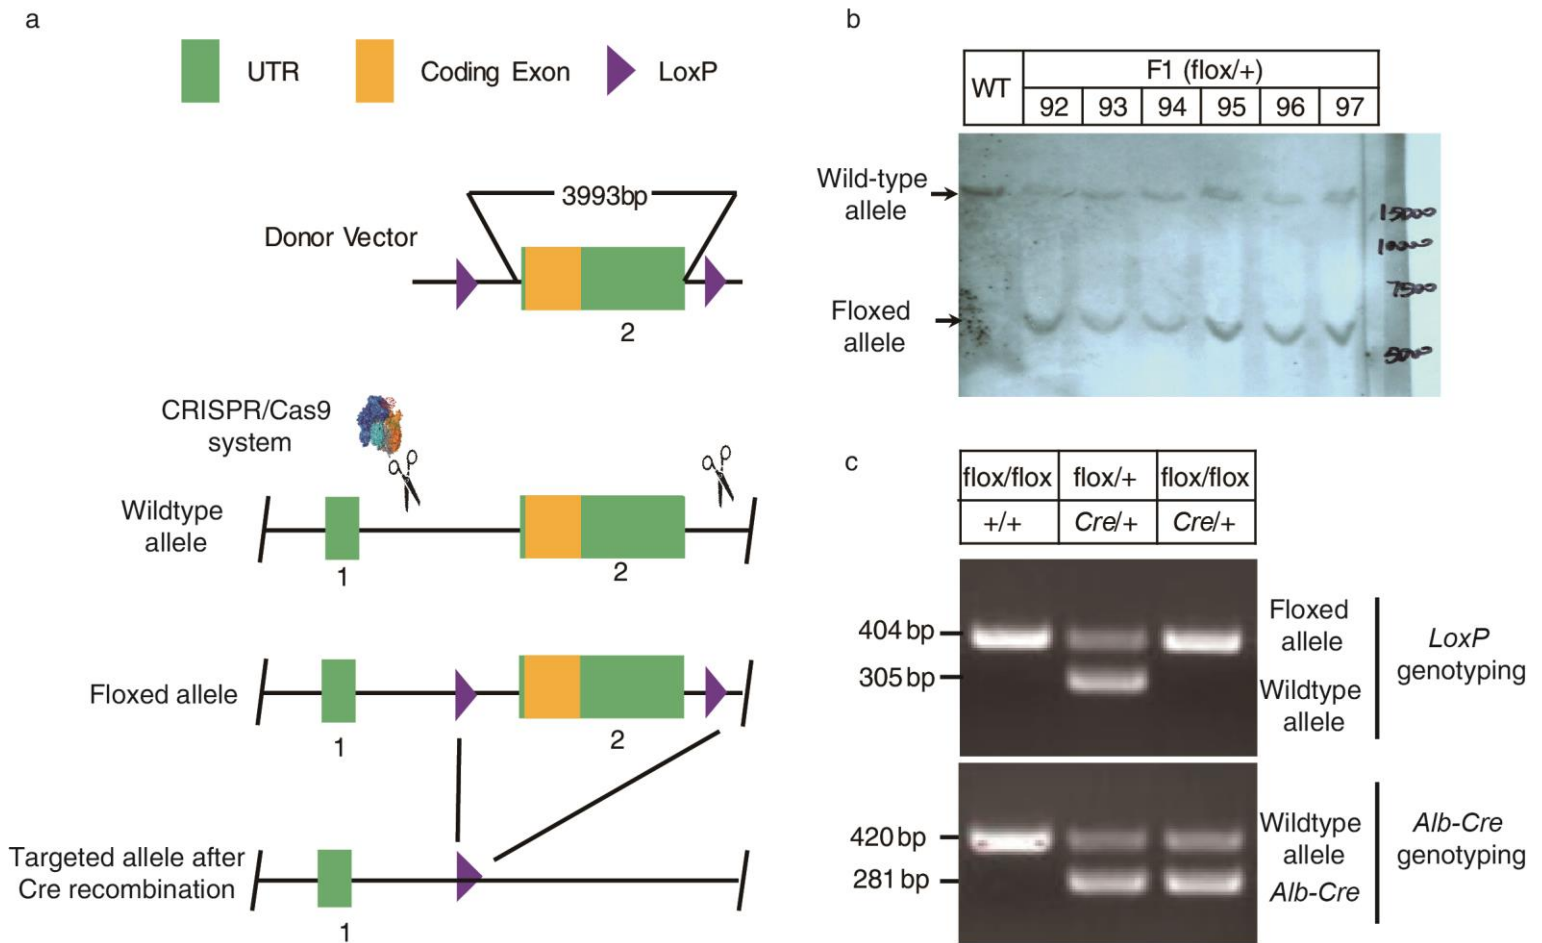

519 **Figure S5, Generating *gpr146* conditional knockout mice with Cre-LoxP system.** **a**, Schematic  
 520 diagram showing the generation of *gpr146* *LoxP* mice with CRISPR/Cas9 system as described in Methods.  
 521 **b**, Southern blot verification of the *LoxP* allele. Genome DNA was extracted from mouse tail and  
 522 subjected to southern blot analysis. Six F1 heterozygous mice were genotyped and wild-type (WT) mice  
 523 were used as control. **c**, PCR genotyping of heterozygous and homozygous liver specific *gpr146* knockout  
 524 mice.

Figure S6

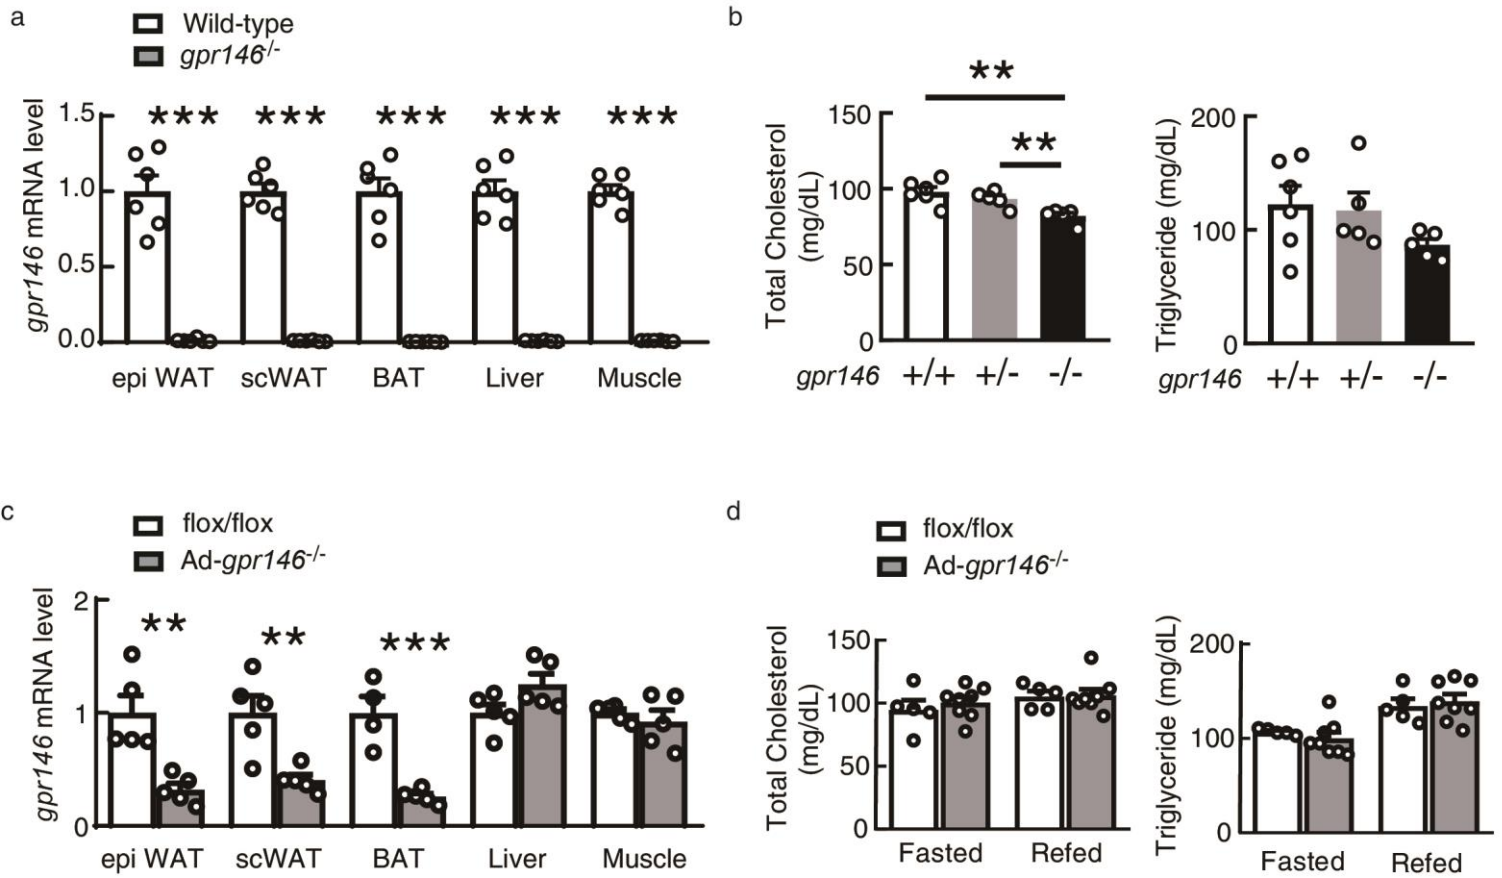

526 **Figure S6, Phenotypic characterization of whole body and adipose tissue specific *gpr146* knockout**  
 527 **mice. a**, mRNA levels of *Gpr146* in tissues of whole body *gpr146* knockout mice (*gpr146*<sup>-/-</sup>) and their  
 528 littermate controls (n=6/group, female, 12-15 weeks). **b**, Plasma levels of total cholesterol and triglyceride  
 529 in overnight fasted heterozygous, homozygous whole body *gpr146* knockout mice and their littermate  
 530 controls (n=5-6/group, male, 8-10 weeks). **c**, *Gpr146* mRNA levels in tissues of adipose tissue specific  
 531 *gpr146* knockout mice (Ad-*gpr146*<sup>-/-</sup>) and their littermate controls (n=4-5/group, male, 9-10 weeks). **d**,  
 532 Plasma levels of total cholesterol and triglyceride in Ad-*gpr146*<sup>-/-</sup> mice and their littermate controls at 16  
 533 hours fasting or 6 hours refeeding after a 16 hours fasting (n=5-8/group, male, 9-10 weeks). epiWAT,  
 534 epididymal white adipose tissue; scWAT, subcutaneous white adipose tissue; BAT, brown adipose tissue.  
 535 All data are expressed as means ± SEM and *p* values were calculated using Student's test (\*\**p*<0.01,  
 536 \*\*\**p*<0.001). All experiments were repeated with similar results.
