# Supplementary material for: Hypercholesterolemia risk associated GPR146 is an orphan G-protein coupled receptor that regulates blood cholesterol level in human and mouse
Source: bioRxiv or medRxiv preprint supplement (doi:10.1101/2020.01.09.901041), 2020-01-10
Supplement: Supplementary file [file media-1.pdf]

**Supplementary table 1**, SNPs that have strong linkage disequilibrium with lead SNP rs1997243. The linkage disequilibrium (LD,  $r^2$ ) was calculated using European population datasets from 1000 genome phase 3 as described in Methods. LD with  $r^2 > 0.8$  are listed and SNPs located in genome active regions are highlighted and subjected to further function studies.

| Variant 1 | Variant 1 location | Variant 2   | Variant 2 location | LD ( $r^2$ ) |
|-----------|--------------------|-------------|--------------------|--------------|
| rs1997243 | 7:1044141          | rs6951245   | 7:1018557          | 1            |
| rs1997243 | 7:1044141          | rs75280240  | 7:1018875          | 1            |
| rs1997243 | 7:1044141          | rs57068908  | 7:1020448          | 1            |
| rs1997243 | 7:1044141          | rs11763020  | 7:1020652          | 1            |
| rs1997243 | 7:1044141          | rs11763765  | 7:1020874          | 1            |
| rs1997243 | 7:1044141          | rs1881128   | 7:1023677          | 1            |
| rs1997243 | 7:1044141          | rs11766669  | 7:1023957          | 1            |
| rs1997243 | 7:1044141          | rs11768895  | 7:1024055          | 0.803571     |
| rs1997243 | 7:1044141          | rs79067319  | 7:1025912          | 1            |
| rs1997243 | 7:1044141          | rs884977    | 7:1026774          | 1            |
| rs1997243 | 7:1044141          | rs74360401  | 7:1027767          | 1            |
| rs1997243 | 7:1044141          | rs143361185 | 7:1028127          | 1            |
| rs1997243 | 7:1044141          | rs118132455 | 7:1028596          | 1            |
| rs1997243 | 7:1044141          | rs78628466  | 7:1028817          | 1            |
| rs1997243 | 7:1044141          | rs144042633 | 7:1029715          | 1            |
| rs1997243 | 7:1044141          | rs11768761  | 7:1030171          | 1            |
| rs1997243 | 7:1044141          | rs76833820  | 7:1030642          | 1            |
| rs1997243 | 7:1044141          | rs28379681  | 7:1030903          | 1            |
| rs1997243 | 7:1044141          | rs28399710  | 7:1030995          | 1            |
| rs1997243 | 7:1044141          | rs28528096  | 7:1031276          | 1            |
| rs1997243 | 7:1044141          | rs112425403 | 7:1031895          | 0.961981     |
| rs1997243 | 7:1044141          | rs74369356  | 7:1032075          | 1            |
| rs1997243 | 7:1044141          | rs77083167  | 7:1032187          | 1            |
| rs1997243 | 7:1044141          | rs199718264 | 7:1032483          | 1            |
| rs1997243 | 7:1044141          | rs74347384  | 7:1032804          | 1            |
| rs1997243 | 7:1044141          | rs78308415  | 7:1032998          | 1            |
| rs1997243 | 7:1044141          | rs75493422  | 7:1033254          | 1            |
| rs1997243 | 7:1044141          | rs118059236 | 7:1033566          | 1            |
| rs1997243 | 7:1044141          | rs113858334 | 7:1033840          | 1            |
| rs1997243 | 7:1044141          | rs79765398  | 7:1034128          | 1            |
| rs1997243 | 7:1044141          | rs79443843  | 7:1035609          | 1            |
| rs1997243 | 7:1044141          | rs113713890 | 7:1036436          | 1            |
| rs1997243 | 7:1044141          | rs78896566  | 7:1040546          | 1            |
| rs1997243 | 7:1044141          | rs79422648  | 7:1040605          | 1            |
| rs1997243 | 7:1044141          | rs113119264 | 7:1040928          | 1            |
| rs1997243 | 7:1044141          | rs140138013 | 7:1041233          | 0.960947     |
| rs1997243 | 7:1044141          | rs186044114 | 7:1041261          | 0.922562     |
| rs1997243 | 7:1044141          | rs145122769 | 7:1041289          | 0.960947     |
| rs1997243 | 7:1044141          | rs181094051 | 7:1041317          | 0.960947     |
| rs1997243 | 7:1044141          | rs185931365 | 7:1041345          | 1            |
| rs1997243 | 7:1044141          | rs117800627 | 7:1041439          | 0.852872     |
| rs1997243 | 7:1044141          | rs76804143  | 7:1042385          | 1            |
| rs1997243 | 7:1044141          | rs77760339  | 7:1044291          | 1            |
| rs1997243 | 7:1044141          | rs113575110 | 7:1044758          | 1            |
| rs1997243 | 7:1044141          | rs1881123   | 7:1045070          | 1            |
| rs1997243 | 7:1044141          | rs77569514  | 7:1045872          | 1            |

|           |           |             |           |          |
|-----------|-----------|-------------|-----------|----------|
| rs1997243 | 7:1044141 | rs148758091 | 7:1046716 | 1        |
| rs1997243 | 7:1044141 | rs11770909  | 7:1047080 | 1        |
| rs1997243 | 7:1044141 | rs74785791  | 7:1048858 | 1        |
| rs1997243 | 7:1044141 | rs74366004  | 7:1048994 | 1        |
| rs1997243 | 7:1044141 | rs77702926  | 7:1049202 | 1        |
| rs1997243 | 7:1044141 | rs78573577  | 7:1049451 | 1        |
| rs1997243 | 7:1044141 | rs76129108  | 7:1049523 | 1        |
| rs1997243 | 7:1044141 | rs78523927  | 7:1049822 | 1        |
| rs1997243 | 7:1044141 | rs74652290  | 7:1050473 | 1        |
| rs1997243 | 7:1044141 | rs78185558  | 7:1050547 | 1        |
| rs1997243 | 7:1044141 | rs78158942  | 7:1050804 | 1        |
| rs1997243 | 7:1044141 | rs2363286   | 7:1051989 | 1        |
| rs1997243 | 7:1044141 | rs11764937  | 7:1052438 | 0.926339 |
| rs1997243 | 7:1044141 | rs79808627  | 7:1052883 | 0.860168 |
| rs1997243 | 7:1044141 | rs56048221  | 7:1052897 | 0.821014 |
| rs1997243 | 7:1044141 | rs77868187  | 7:1054332 | 0.961981 |
| rs1997243 | 7:1044141 | rs75016635  | 7:1054485 | 0.961981 |
| rs1997243 | 7:1044141 | rs113066613 | 7:1054492 | 0.961981 |
| rs1997243 | 7:1044141 | rs11763793  | 7:1054706 | 0.961981 |
| rs1997243 | 7:1044141 | rs11764748  | 7:1054872 | 0.961981 |
| rs1997243 | 7:1044141 | rs11763835  | 7:1054877 | 0.961981 |
| rs1997243 | 7:1044141 | rs78861357  | 7:1055782 | 0.961981 |
| rs1997243 | 7:1044141 | rs76713558  | 7:1056230 | 0.961981 |
| rs1997243 | 7:1044141 | rs79658522  | 7:1056241 | 0.961981 |
| rs1997243 | 7:1044141 | rs76525951  | 7:1056377 | 0.961981 |
| rs1997243 | 7:1044141 | rs79683221  | 7:1056503 | 0.961981 |
| rs1997243 | 7:1044141 | rs78185801  | 7:1056731 | 0.961981 |
| rs1997243 | 7:1044141 | rs80031817  | 7:1057157 | 0.961981 |
| rs1997243 | 7:1044141 | rs78143408  | 7:1057210 | 0.961981 |
| rs1997243 | 7:1044141 | rs78351779  | 7:1057387 | 0.961981 |
| rs1997243 | 7:1044141 | rs11761941  | 7:1057547 | 0.961981 |
| rs1997243 | 7:1044141 | rs11767527  | 7:1057758 | 0.961981 |
| rs1997243 | 7:1044141 | rs61910751  | 7:1058259 | 0.961981 |
| rs1997243 | 7:1044141 | rs77434655  | 7:1058769 | 0.961981 |
| rs1997243 | 7:1044141 | rs75398423  | 7:1058778 | 0.961981 |
| rs1997243 | 7:1044141 | rs112309216 | 7:1060660 | 0.961981 |
| rs1997243 | 7:1044141 | rs76161580  | 7:1060671 | 0.961981 |
| rs1997243 | 7:1044141 | rs76388414  | 7:1061058 | 0.961981 |
| rs1997243 | 7:1044141 | rs77305932  | 7:1061225 | 0.961981 |
| rs1997243 | 7:1044141 | rs79788515  | 7:1061443 | 0.926339 |
| rs1997243 | 7:1044141 | rs11768486  | 7:1061654 | 0.961981 |
| rs1997243 | 7:1044141 | rs11766526  | 7:1061797 | 0.961981 |
| rs1997243 | 7:1044141 | rs76214082  | 7:1062461 | 0.961981 |
| rs1997243 | 7:1044141 | rs75488469  | 7:1062486 | 0.961981 |
| rs1997243 | 7:1044141 | rs80094748  | 7:1064322 | 0.961981 |
| rs1997243 | 7:1044141 | rs113146460 | 7:1065528 | 0.961981 |
| rs1997243 | 7:1044141 | rs61753396  | 7:1065736 | 0.961981 |
| rs1997243 | 7:1044141 | rs113642700 | 7:1066018 | 0.961981 |
| rs1997243 | 7:1044141 | rs149125341 | 7:1066258 | 0.961981 |
| rs1997243 | 7:1044141 | rs553221139 | 7:1066867 | 0.961981 |
| rs1997243 | 7:1044141 | rs111705570 | 7:1067106 | 0.961981 |
| rs1997243 | 7:1044141 | rs79327308  | 7:1068505 | 0.961981 |
| rs1997243 | 7:1044141 | rs117729148 | 7:1068895 | 0.961981 |
| rs1997243 | 7:1044141 | rs113221697 | 7:1069107 | 0.961981 |

|           |           |             |           |          |
|-----------|-----------|-------------|-----------|----------|
| rs1997243 | 7:1044141 | rs113365567 | 7:1069149 | 0.961981 |
| rs1997243 | 7:1044141 | rs113448118 | 7:1069318 | 0.961981 |
| rs1997243 | 7:1044141 | rs79143504  | 7:1070576 | 0.961981 |
| rs1997243 | 7:1044141 | rs574980713 | 7:1070621 | 0.961981 |
| rs1997243 | 7:1044141 | rs111161354 | 7:1070686 | 0.961981 |
| rs1997243 | 7:1044141 | rs532319453 | 7:1070844 | 0.961981 |
| rs1997243 | 7:1044141 | rs558665380 | 7:1070854 | 0.961981 |
| rs1997243 | 7:1044141 | rs190638559 | 7:1070869 | 0.961981 |
| rs1997243 | 7:1044141 | rs200416508 | 7:1070909 | 0.961981 |
| rs1997243 | 7:1044141 | rs74887741  | 7:1071022 | 0.961981 |
| rs1997243 | 7:1044141 | rs79617366  | 7:1072322 | 0.961981 |
| rs1997243 | 7:1044141 | rs111899361 | 7:1072712 | 0.961981 |
| rs1997243 | 7:1044141 | rs80212261  | 7:1074376 | 0.961981 |
| rs1997243 | 7:1044141 | rs77346188  | 7:1074387 | 0.961981 |
| rs1997243 | 7:1044141 | rs77943789  | 7:1100522 | 0.831632 |
| rs1997243 | 7:1044141 | rs10266519  | 7:1103341 | 0.86134  |
| rs1997243 | 7:1044141 | rs74976697  | 7:1120869 | 0.803571 |
| rs1997243 | 7:1044141 | rs28600085  | 7:1130000 | 0.803571 |
| rs1997243 | 7:1044141 | rs28483034  | 7:1130535 | 0.803571 |
| rs1997243 | 7:1044141 | rs183256883 | 7:1135851 | 0.803571 |
| rs1997243 | 7:1044141 | rs6952546   | 7:948373  | 0.883578 |
| rs1997243 | 7:1044141 | rs113184427 | 7:950403  | 0.922546 |
| rs1997243 | 7:1044141 | rs113766238 | 7:950606  | 0.922546 |
| rs1997243 | 7:1044141 | rs79672483  | 7:955120  | 0.922546 |
| rs1997243 | 7:1044141 | rs113464035 | 7:955606  | 0.922546 |

Note: LD data were generated on Ensemble using 1000 genome phase 3 data, with European population. The window is 200kb. Highlighted SNPs are the one localized in genomic active regions and used for function studies.

**Supplementary Table 2: This table contains sequence information used in this study.**

**shRNA sequence for mouse *gpr146*.**

| Target Gene   | Sequence              |
|---------------|-----------------------|
| <i>Gpr146</i> | GCTTAGGCTATAATGCTCTTC |

**gRNA sequence for rs1997243 site**

| Target Site | Sequence              |
|-------------|-----------------------|
| rs1997243   | GCAAACCTTCGGTGAAGAAAG |

**Primers for qRT-PCR.**

| Human              | Forward                | Reverse                  |
|--------------------|------------------------|--------------------------|
| <i>CYP2W1</i>      | CCGATTTGACTACCGGGACC   | CGTCCACATAGCTGCACAC      |
| <i>GPER1</i>       | CACCAGCAGTACGTGATCGG   | CATCTTCTCGCGGAAGCTGAT    |
| <i>C7orf50</i>     | AGCTGAAAAAGGAACGGAAGAA | TGGAGAAGTGCTCATCGGGAA    |
| <i>COX19</i>       | TTTCGGGACCAAGAGCTTCC   | GCATCAATTTTCTCTCCATCTGC  |
| <i>ZFAND2A</i>     | TGTGACTCTCACCTGGGAA    | GGGTGAGCACCCAGCTT        |
| <i>GPR146</i>      | TGAGCCTCGACCACTACATC   | GCTTCTGCGTTCTGCATCTTG    |
| <i>36B4</i>        | TGCATCAGTACCCCATCTATCA | AAGGTGTAATCCGTCTCCACAGA  |
| Mouse              | Forward                | Reverse                  |
| <i>Albumin</i>     | CGAGAAGCTTGGAGAATATGGA | CTTGGTGCCCACTCTTCCTA     |
| <i>Apob</i>        | CGTGGGCTCCAGCATTCTA    | TCACCAGTCATTTCTGCCTTTG   |
| <i>F4/80</i>       | CTTTGGCTATGGGCTTCCAGTC | GCAAGGAGGACAGAGTTTATCGTG |
| <i>Gpr146</i>      | TGACCATGTACTCCACTGCAC  | AAGACACGTGACTGCAGATGT    |
| <i>36b4</i>        | CACTGGTCTAGGACCCGAGAAG | GGTGCCTCTGGAGATTTTCG     |
| <i>Gapdh</i>       | TGTGTCCGTCGTGGATCTGA   | CCTGCTTACCACCTTCTTGAT    |
| <i>Cyclophilin</i> | TGGAGAGCACCAAGACAGACA  | TGCCGGAGTCGACAATGAT      |

**Primers used to amplify genome sequence from HepG2 cells and primers used to introduce mutations for each SNPs.**

| Figures  | Primer sequence                                                                                                                       |
|----------|---------------------------------------------------------------------------------------------------------------------------------------|
| Fig 1b-c | <b>Reference allele primer</b><br>F:ATTTCTCTATCGATAGGTACCATGGTGACCTATCTCATTGACGC<br>R:ACTTAGATCGCAGATCTCGAGGAATGGAGGACTCAAGTACATCTTCA |
|          | <b>Primers for mutagenesis</b>                                                                                                        |
|          | rs1997243 F:AAACTTCGGTGAAGAAGGAGGGGCAGGTGT<br>R:CTTCTTACCAGGTTTGTCTGCTGTTTCCA                                                         |
|          | rs77760339 F:CCGCGCTGGGCACTAAGATAATTCTCAA<br>R:ATCTTAGTGCCCAGCGCGTTTC                                                                 |
|          | rs113575110 F:TCCCACGGCGGACGCTGCGCTTACTG<br>R:CAGCGTCCGCGTGGGAGCCACAGCAGCTT                                                           |
|          | rs1881123 F:TGGATCTGCTGTCAGTTGTCTTGGACAGTT<br>R:ACAACTGACAGCAGATCCTACACCTCCATGTA                                                      |

|         |                                                                                                                                                                                                                                                                                                                                                                                                                                                                                                                                                                                                              |
|---------|--------------------------------------------------------------------------------------------------------------------------------------------------------------------------------------------------------------------------------------------------------------------------------------------------------------------------------------------------------------------------------------------------------------------------------------------------------------------------------------------------------------------------------------------------------------------------------------------------------------|
| Fig S3b | <p><b>Reference allele primer</b><br/> F:ATTTCTCTATCGATAGGTACCCTCTGCCAACACAATGGAC<br/> R:ACTTAGATCGCAGATCTCGAGGAGCGGGAGAAGACCTCAGG</p> <p><b>Primers for mutagenesis</b><br/> F:ACATACATAGGCCCTGCAAGAGC<br/> R:GCCTATGTATGTCTGCAGCCAGG</p>                                                                                                                                                                                                                                                                                                                                                                   |
| Fig S3d | <p><b>Reference allele primer</b><br/> F:ATTTCTCTATCGATAGGTACCGCCACCGCCTCCTCAGAA<br/> R:ACTTAGATCGCAGATCTCGAGCTGTGTGGGCTGGCGCAT</p> <p><b>Primers for mutagenesis</b></p> <p>rs74360401 F:CGGCACAGGGAGAGGGCAGGGCGGCG<br/> R:CGCCGCCTCGCCTCTCCCTGTGCCG</p> <p>rs143361185 F:CGGAGCGGGGCCGAGCAGCGTCTG<br/> R:CAGACGCTGCTGCGGCCCGCTCCG</p> <p>rs118132455 F:GAACTGCGGGGAGGGCGAACCCCGCCCGCGCAG<br/> R:CTGCGCGGGCGGGGGTTCGCCCTCCCGCAGTTC</p> <p>rs78628466 F:CAATCTGACTCCATGCCCCCATCTCCTCC<br/> R:GGAGGAGATGGGGGCATGGAGTCAGATTG</p> <p>rs144042633 F:GGTCGCGGGCCTGCTCTGGAGGCC<br/> R:GGCCTCCAGAGCAGGCCCGCGACC</p> |
| Fig S3e | <p><b>Reference allele primer</b><br/> F:ATTTCTCTATCGATAGGTACCGGAGGATGAGCAAAGGCAGA<br/> R:ACTTAGATCGCAGATCTCGAGCCACGCCTGCTGATGTGATA</p> <p><b>Primers for mutagenesis</b></p> <p>rs181094051 Minor allele sequence was synthesized due to multi-repeats near this SNP</p> <p>rs185931365 Minor allele sequence was synthesized due to multi-repeats near this SNP</p> <p>rs76804143 F:TCCAGCTCCTGACCAGCA<br/> R:AGATTGGGGCGTAGGGGGGCATGTGGCCCTGACTCAGC</p>                                                                                                                                                   |
| Fig S3f | <p><b>Reference allele primer</b><br/> F:ATTTCTCTATCGATAGGTACCAATAGGACTTGGGCTCCGCA<br/> R:ACTTAGATCGCAGATCTCGAGAGACAGCATGTCATCATCTGACACT</p> <p>rs117800627 Minor allele sequence was synthesized directly due to multi-repeats near this SNP. The sequence was further confirmed by sanger sequencing.</p>                                                                                                                                                                                                                                                                                                  |
| Fig S3g | <p><b>Reference allele primer</b><br/> F:ATTTCTCTATCGATAGGTACCGTTAGTATTACAAACCTGGCAAGTCAG<br/> R:ACTTAGATCGCAGATCTCGAGGGATTCCAGGTGACATCCTAGG</p> <p><b>Primers for mutagenesis</b></p> <p>rs77569514 F:ACACATCCGTGCTGGCATCCACGTGTCATCCTGCC<br/> R:GGCAGGATGACACGTGGATGCCAGCACGGATGTGT</p>                                                                                                                                                                                                                                                                                                                    |
| Fig S3h | <p><b>Reference allele primer</b><br/> F:ATTTCTCTATCGATAGGTACCCAGAGAAGCGCAGCAGCG<br/> R:ACTTAGATCGCAGATCTCGAGCGCACAGTGATTCCCGAAGT</p>                                                                                                                                                                                                                                                                                                                                                                                                                                                                        |

|         |                                                                                                                                                                                                                                                                                                                                                                                                                                                                                                                                                              |
|---------|--------------------------------------------------------------------------------------------------------------------------------------------------------------------------------------------------------------------------------------------------------------------------------------------------------------------------------------------------------------------------------------------------------------------------------------------------------------------------------------------------------------------------------------------------------------|
|         | <p><b>Primers for mutagenesis</b></p> <p>rs78861357 F:GAGACAGCCCTCCCGTTCCGATCTTCTAATC<br/>R:GATTAGAAGATCGGAACGGGAGGGCTGTCTC</p> <p>rs76713558 F:GTGTTAGTGAGGGGCTAGACAAGATG<br/>R:CATCTTGTCTAGCCCCTCACTAACAC</p> <p>rs79658522 F:GAGCTAGACAAGGTGAGCACGTGAG<br/>R:CTCACGTGCTCACCTTGTCTAGCTC</p> <p>rs76525951 F:CACCTGACCCTCATTGCGGCTGCTGG<br/>R:CCAGCAGCCGCAATGAGGGTCAGGTG</p> <p>rs79683221 F:GCCTGCATGCCTGGCCGAGGGCCG<br/>R:CGGCCCTGCGGCCAGGCATGCAGGC</p> <p>rs78185801 F:GGGAACGATGCCATCTGCTCGTCTG<br/>R:CAGACGAGCAGATGGCATCGTTCCC</p>                     |
| Fig S3j | <p><b>Reference allele primer</b></p> <p>F:ATTTCTCTATCGATAGGTACCCCCGGGGTACTGATGCC<br/>R:ACTTAGATCGCAGATCTCGAGAAGATGCTTCTAGGCTGCGG</p>                                                                                                                                                                                                                                                                                                                                                                                                                        |
|         | <p><b>Primers for mutagenesis</b></p> <p>rs74785791 F:CAGGTTCTCCTTCCCAGTCCCATGTTC<br/>R:GAACATGGGACTGGGAAGGAGAACCTG</p> <p>rs74366004 F:GAACATAAAAACCATACAACCTGCAAAGCCTCTGC<br/>R:GCAGAGGCTTTGCAGTTGTATGGTTTTTATGTTC</p> <p>rs77702926 F:CACCCTGCCCCACATTTCCCCTGCAC<br/>R:GTGCAGGGGAAATGTGGGGCAGGGTG</p> <p>rs78573577 F:GCAAGGATGTCACATGCCTGCAAAGGC<br/>R:GCCTTTGCAGGCATGTGACATCCTTGC</p> <p>rs76129108 F:CATGCTTGCTGCCACTCCGGAGCCCAG<br/>R:CTGGGCTCCGGAGTGGGCAGCAAGCATG</p> <p>rs78523927 F:GGCACCCTGTACCGGGTTCTATGAC<br/>R:GTCATAGAACCCGGTACAGTGGTGCC</p> |
| Fig S3k | <p><b>Reference allele primer</b></p> <p>F:ATTTCTCTATCGATAGGTACCAAACGATTGAAACTGGGCCA<br/>R:ACTTAGATCGCAGATCTCGAGACTGTGGACGCCCTCCC</p>                                                                                                                                                                                                                                                                                                                                                                                                                        |
|         | <p><b>Primers for mutagenesis</b></p> <p>rs11764937 F:GGGGGAGGGTTTTGGGGGAGATGC<br/>R:GCATCTCCCCCAAACCCCTCCCC</p> <p>rs79808627 F:GAGCTCCAGAATCTTTCATCGCCGC<br/>R:GCGGCGATGAAAGATTCTGGAGGCTC</p> <p>rs56048221 F:GTTTCATCGCCGCCACAACAACTCAGG<br/>R:CCTGAGTTTGTGTGGCGGCGATGAAAC</p>                                                                                                                                                                                                                                                                            |
